# Supplementary material for: A 4D transcriptomic map for the evolution of multiple sclerosis-like lesions in the marmoset brain
Source: PubMed Central journal article supplement (PMC10557631; doi:10.1101/2023.09.25.559371), 2023-09-27
Supplement: NIHPP2023.09.25.559371V1-supplement-1.pdf [file NIHPP2023.09.25.559371V1-supplement-1.pdf]

# Fig S1 - related to Fig1

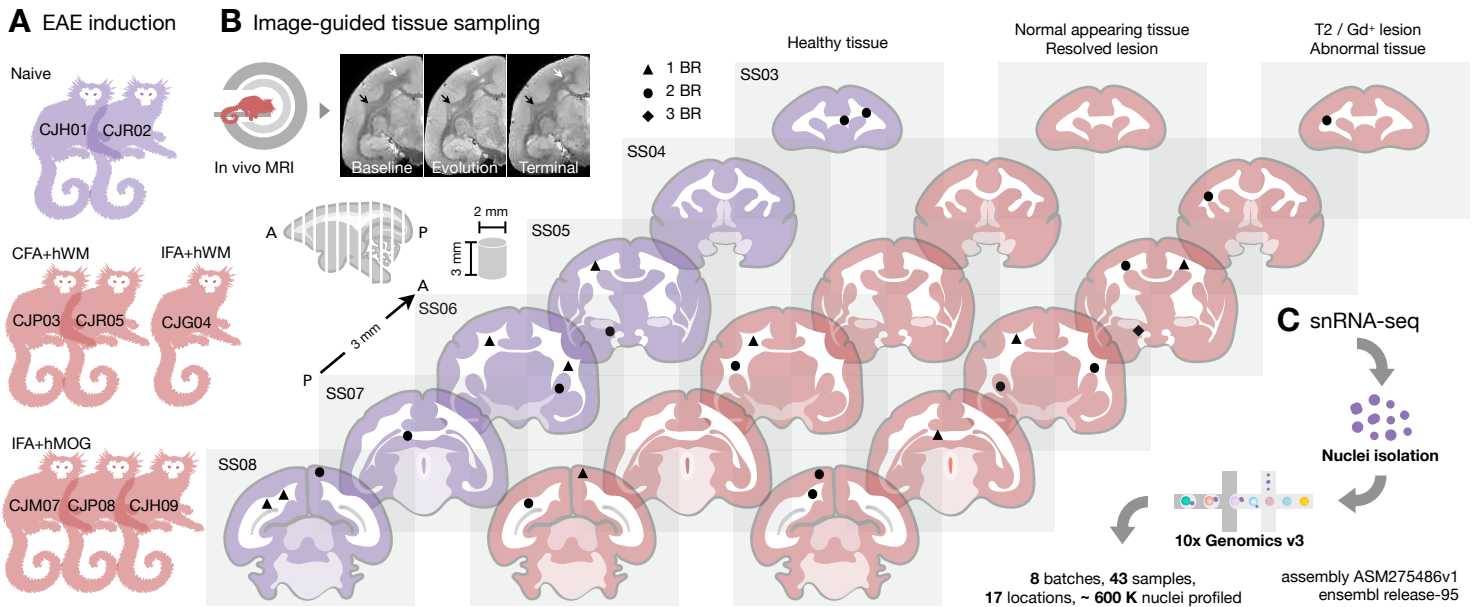

**D Sample index**

| Coarse  | Fine |   | He.Control      | NA.Control | Re.Lesion | T2.Lesion | Gd.Lesion                        | Ab.Tissue |              |
|---------|------|---|-----------------|------------|-----------|-----------|----------------------------------|-----------|--------------|
| "WM"    | fWM  | 2 | CJH01, CJR02    |            |           | 3         | CJP03, CJG04, CJP08              | 1         | CJM07        |
|         | tWM  | 2 | CJH01, CJR02    | 1          | CJM07     | 3         | CJP03, CJR05 x2                  | 1         | CJH09        |
|         | pWM  | 3 | CJH01 x2, CJR02 | 1          | CJG04     | 6         | CJP03 x2, CJM07 x2, CJP08, CJH09 |           |              |
|         | aCC  | 2 | CJH01, CJR02    |            |           |           |                                  |           |              |
|         | pCC  | 2 | CJH01, CJR02    |            |           | 1         | CJP08                            |           |              |
|         | OpT  | 2 | CJH01, CJR02    |            |           | 3         | CJM07, CJP08, CJH09              |           |              |
| "other" | LGN  | 2 | CJH01, CJR02    |            |           |           |                                  | 2         | CJP08, CJH09 |
| "GM"    | pCTX | 2 | CJH01, CJR02    | 1          | CJH09     | 2         | CJP08, CJH09                     |           |              |

1520 **FigS1. related to Fig1. Experimental design used to create a transcriptome map for the evolution of white**  
1521 **matter (WM) lesions with single nucleus resolution.**

1522

1523 (A) The dataset includes marmosets that were inoculated with human white matter (hWM) or recombinant  
1524 human myelin oligodendrocyte glycoprotein (hMOG) emulsified in complete (CFA) or incomplete Freund's  
1525 adjuvant (IFA) to induce experimental autoimmune encephalomyelitis (EAE) and healthy, naïve controls.

1526 (B) The experimental workflow involved scanning and categorizing brain tissue using MRI. Postmortem brains  
1527 were sliced into 3-mm slabs from anterior (A) to posterior (P). Specific areas of interest were sampled as  
1528 cylinders with a diameter of 2 mm and height of 3 mm. These sampled areas were labeled on the standard  
1529 slab (SS) index and grouped based on disease condition. The number of biological repeats (BR) is indicated  
1530 by black annotations on the SS.

1531 (C) Nuclei were isolated from the sampled areas to prepare cDNA libraries, which were then sequenced.

1532 (D) Sampled areas were categorized into 3 types: coarse brain region, fine tissue location, and disease  
1533 condition. Abbreviations: f (frontal), t (temporal), p (parietal), WM (white matter), a (anterior), p (posterior),  
1534 CC (corpus callosum), OpT (optic tract), CTX (cortex), LGN (lateral geniculate nucleus), EAE (experimental  
1535 autoimmune encephalomyelitis), He (healthy), NA (normal-appearing), Re (resolved), T2 (T<sub>2</sub>-hyperintense  
1536 MRI detected), Gd (gadolinium), and Ab (abnormal).

1537

# Fig S2 - related to Fig 1

## A Prepare tissue block for 10x Visium

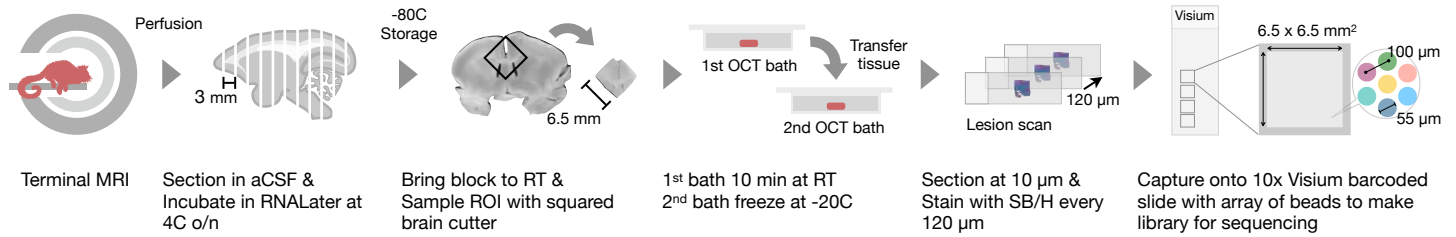

## B Sample index

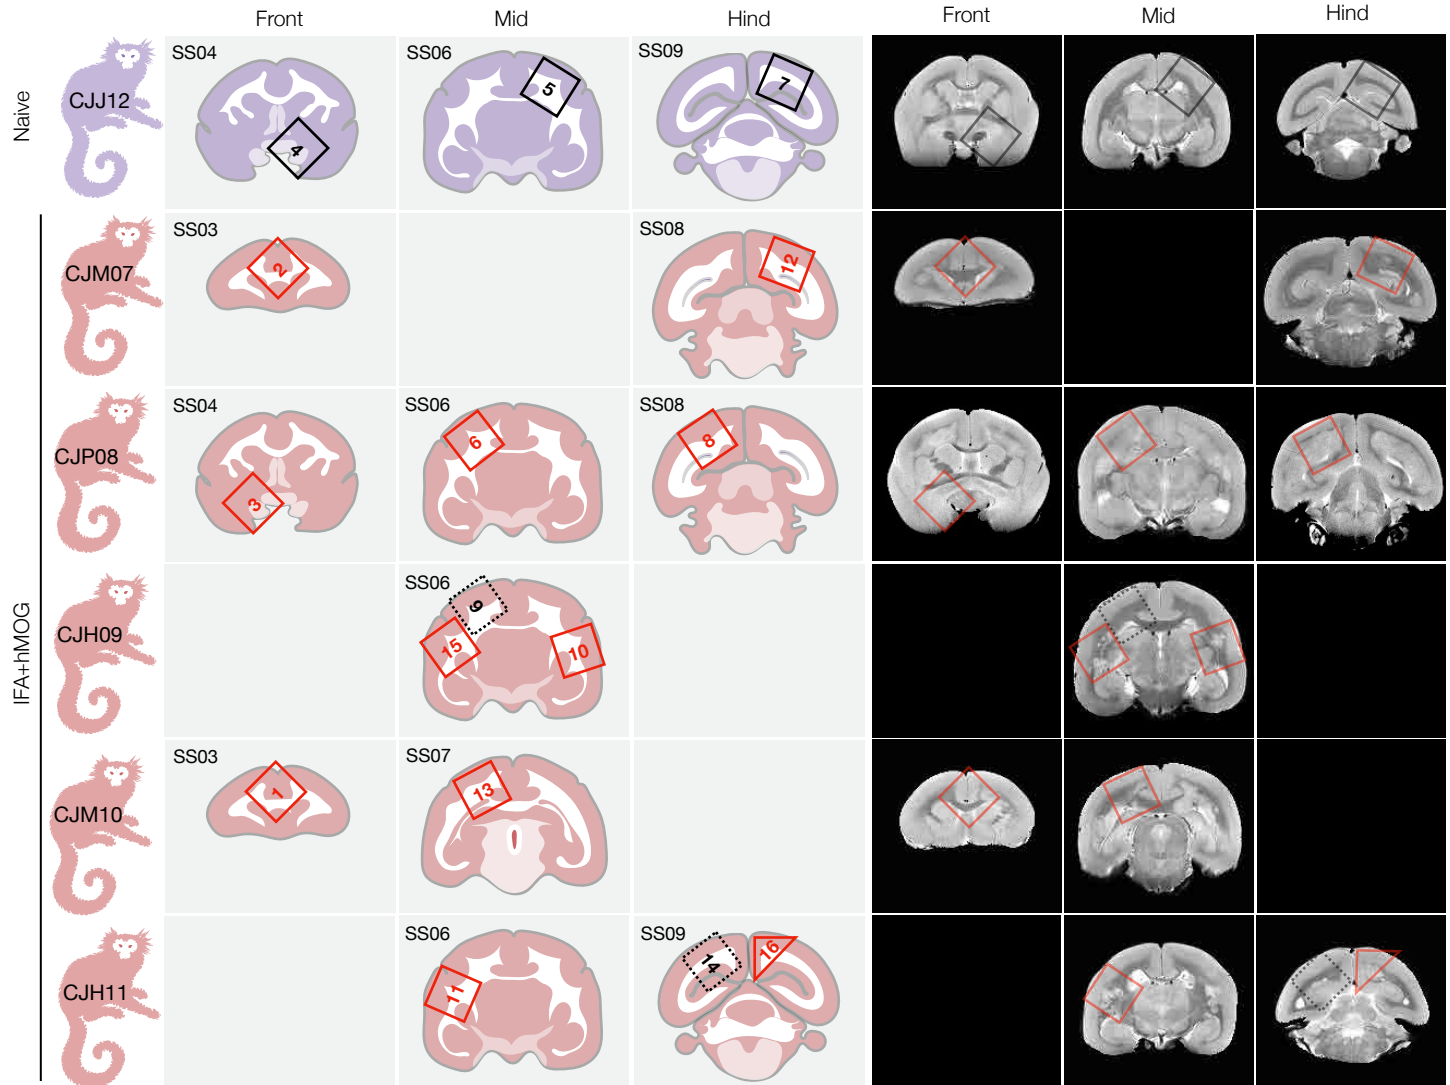

## D Marmoset brain mapping MRI atlas

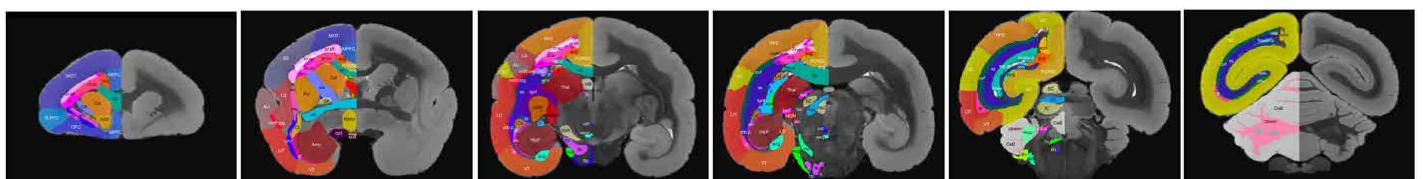

1538 **FigS2. related to Fig1. Experimental design for creating a transcriptome map of white matter (WM) lesions with**  
1539 **spatial resolution.**

1540

1541 (A) The experimental workflow involves identifying WM lesions using magnetic resonance imaging (MRI) and  
1542 preparing postmortem tissue for spatial transcriptome analysis using the 10x Visium platform.  
1543 Abbreviations: aCSF (artificial cerebrospinal fluid), RT (room temperature), ROI (region of interest), OCT  
1544 (optimal cutting temperature), SB (Sudan black), H (hematoxylin).

1545 (B) The dataset includes marmosets inoculated with recombinant human myelin oligodendrocyte glycoprotein  
1546 (hMOG) emulsified in incomplete Freund's adjuvant (IFA). Sampled areas were blocked (6.5x6.5x3 mm<sup>3</sup>),  
1547 labeled onto the standard slab (SS) index, and grouped by matching brain area across diseased conditions.

1548 (C) Proton density-weighted (PDw) MRI was performed at the terminal time point and matched with the  
1549 sampled tissue areas.

1550 (D) A postmortem MRI atlas overlaid with brain region labels was used to match with the selected terminal  
1551 PDw MRI.

1552



# Fig S3 - related to Fig1

In vivo MRI — Histology — Spatial transcriptome — Region annotation

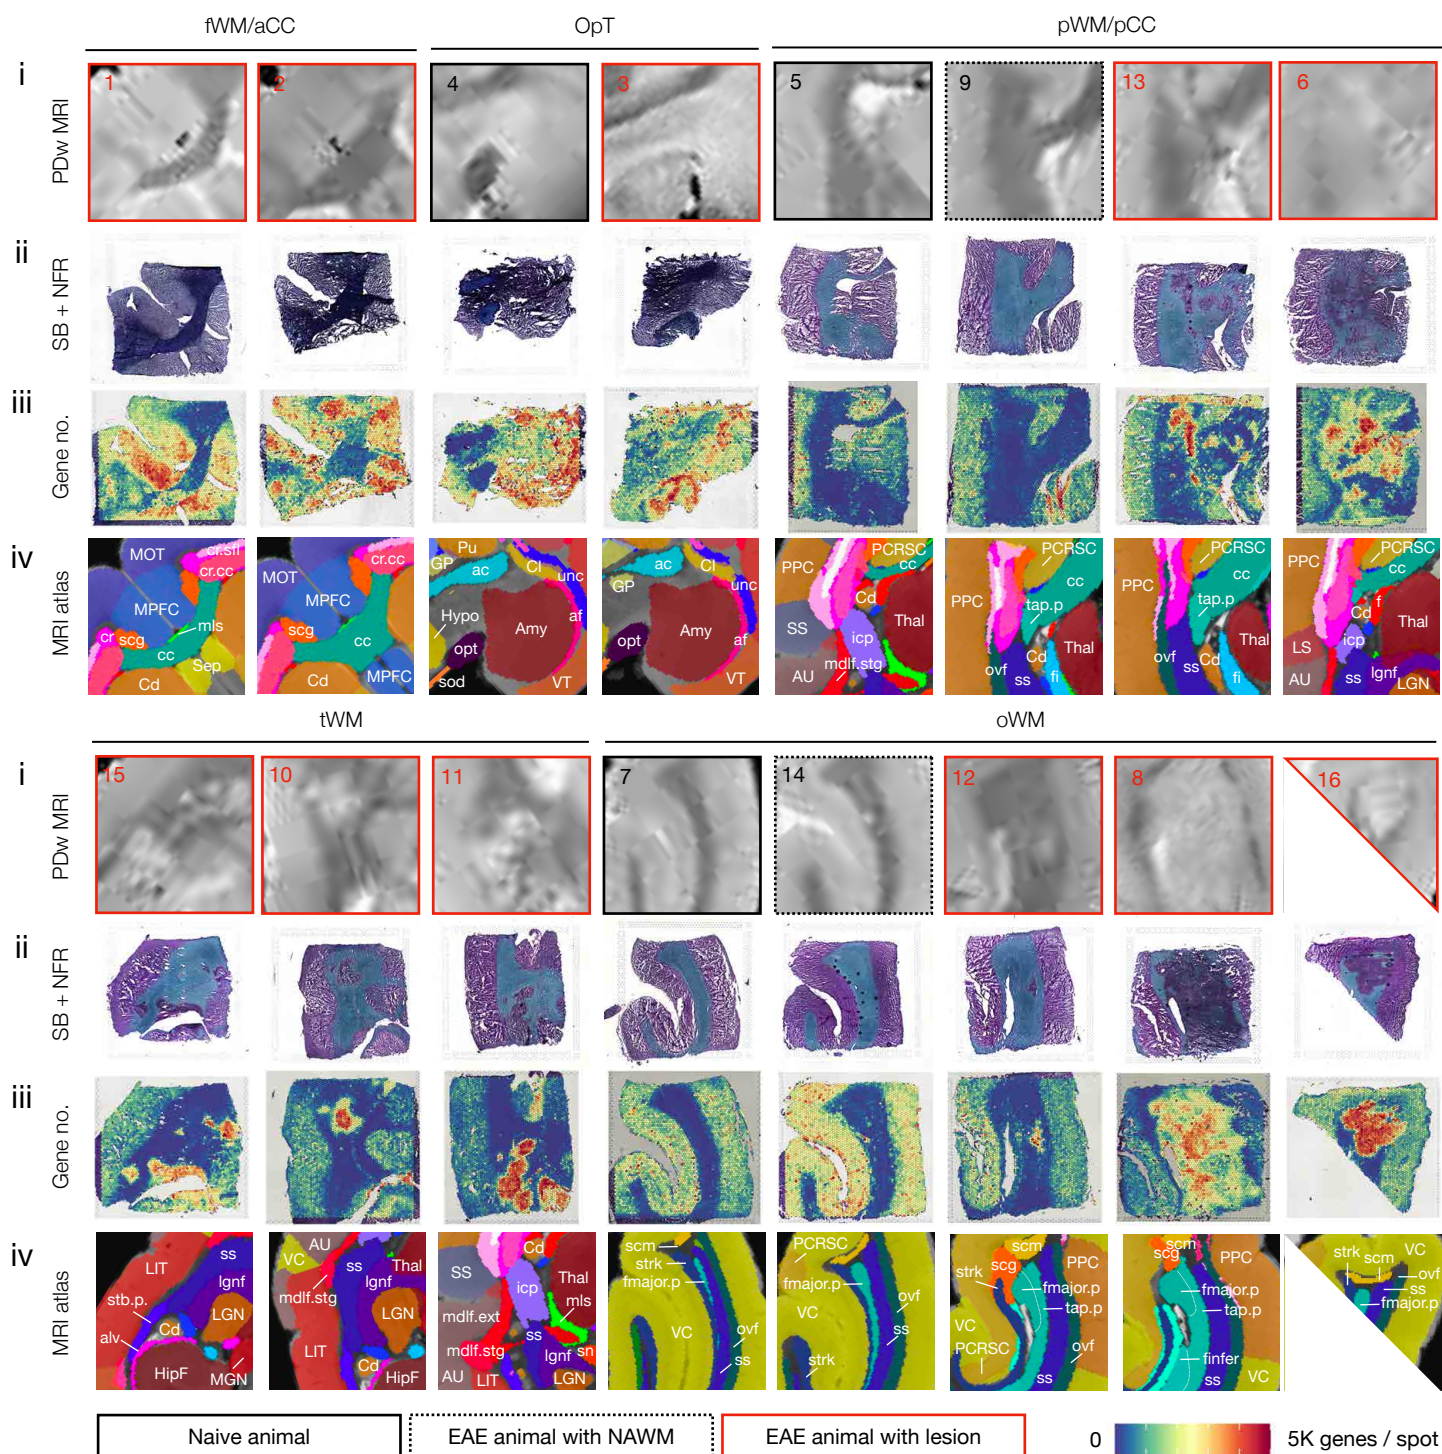

1553 **FigS3. related to Fig1. Matched brain regions imaged by different modalities.**

1554

- 1555 i) In vivo brain PDw MRI acquired on a 7 Tesla scanner at the disease terminal.
- 1556 ii) Histological examination of myelin content using Sudan black (SB) and nuclear fast red (NFR) staining of  
1557 postmortem tissue.
- 1558 iii) RNA landscape visualized through the 10x Visium platform.
- 1559 iv) Marmoset MRI atlas with region annotations.

1560

1561 See source data for the full list of abbreviations for brain regions.

1562

# Fig S4 - related to Fig1

## A M3Q image processing pipeline: WM lesion distribution quantification

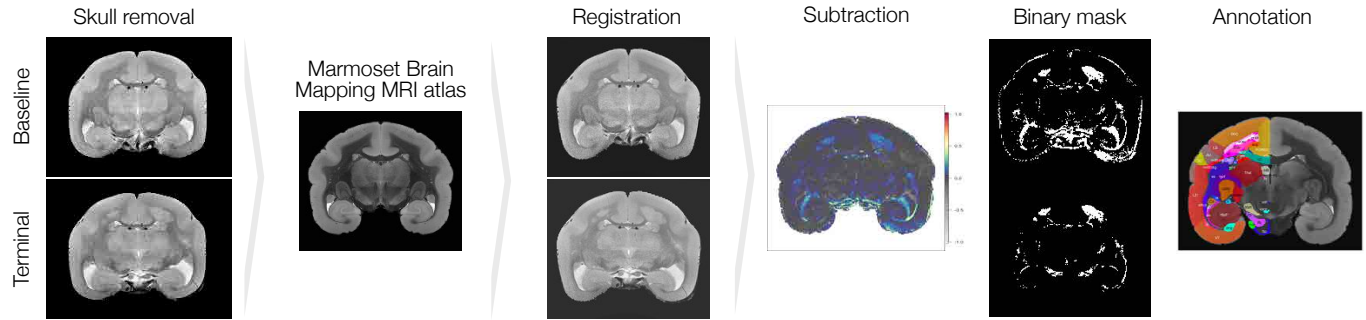

## B ST image processing pipeline: lesion rim assignment

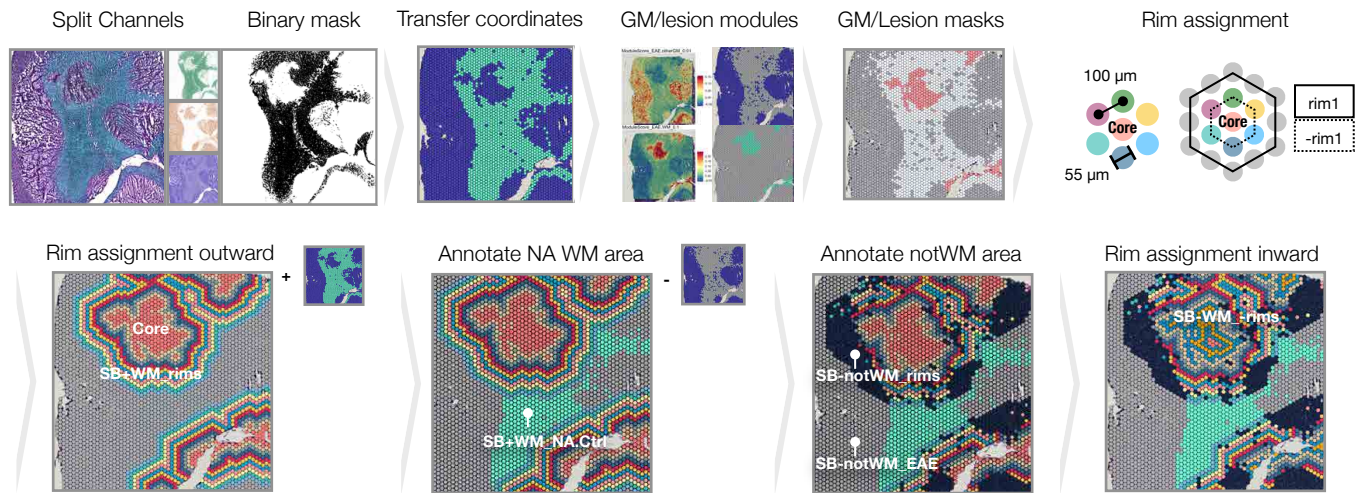

## C Spatial resolution enhancement, gene set expression probability comparison, and cell type inference

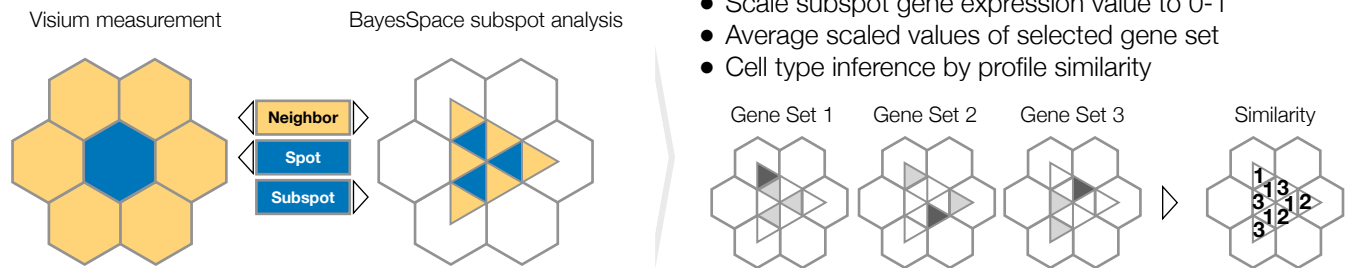



1563 **FigS4. related to Fig1. Image processing and resolution enhancement pipelines used to quantify white matter**  
1564 **(WM) lesion load, generate lesion subregion masks, and deconvolute mixed transcript signals.**

- 1565
- 1566 (A) To gain insight into lesion development and progression, an MRI characterization of MS-like lesions in the  
1567 Marmoset Quantitatively (M3Q) pipeline was developed, including the following steps (**Methods**): Proton  
1568 density-weighted (PDw) MRI images at baseline (before EAE induction) and terminal (before tissue  
1569 collection) time points were subjected to the N4 bias field correction algorithm. The brain portion of the  
1570 images, corresponding to the region of interest, was extracted using a skull-removal algorithm to improve  
1571 image alignment. Each image was individually registered to the marmoset MRI atlas using bUnwarpJ,  
1572 achieving spatial alignment across time points and animals. MRI intensity changes were calculated by  
1573 subtracting the normalized terminal image from the baseline image, providing information about lesion  
1574 location. Binary lesion masks were created by applying intensity thresholding to the subtracted images,  
1575 segmenting the region of interest. The WM portion of the lesion mask was parsed and analyzed using atlas  
1576 annotation indexing, enabling further characterization of the lesions based on location and distribution.
- 1577 (B) To gain insight into the regionally enriched signal distribution within and near the WM lesion, a spatial  
1578 transcriptome (ST) image processing pipeline was employed with the following steps: The myelinated WM  
1579 area (Sudan black-positive) was extracted using the "Color Deconvolution" function in Fiji with the default  
1580 "H DAB" setting, resulting in an SB<sup>+</sup> WM binary mask. The coordinates of the SB<sup>+</sup> WM mask were transferred  
1581 to the 10x Visium spot hexagon coordinate system using Seurat, facilitating the spatial mapping of gene  
1582 expression data. To distinguish SB<sup>-</sup> gray matter (GM) from SB<sup>-</sup> demyelinated WM, GM and lesion gene  
1583 module scores were calculated and filtered to create GM and lesion masks accordingly. Spots that exhibited  
1584 both SB<sup>-</sup> and IMM<sup>+</sup> signals were identified as the lesion core. Next, 10 concentric rims (SB<sup>+</sup>WM\_rims)  
1585 extending outward from the lesion core were assigned to mark the adjacent lesion neighborhoods. The  
1586 normal-appearing (NA) WM area was annotated by subtracting the lesion neighborhoods from the SB<sup>+</sup> WM  
1587 mask in animals with experimental autoimmune encephalomyelitis (EAE), and this region was labeled as  
1588 "SB<sup>+</sup>WM\_NA.Ctrl." Additionally, lesion neighborhoods that overlapped with the GM mask were labeled as  
1589 "SB<sup>-</sup>notWM\_rims," while the supplemental area was labeled as "SB<sup>-</sup>notWM\_EAE" in animals with EAE.  
1590 Subregions within the lesion core were further divided based on centripetal rim assignments (SB<sup>-</sup>WM\_  
1591 rims). For healthy animals, "SB<sup>+</sup>WM\_He.Ctrl" and "SB<sup>-</sup>notWM\_He" labels were used to annotate tissue with  
1592 or without SB staining, respectively.
- 1593 (C) The spatial transcriptome resolution, initially measured at the spot level using the 10x Visium platform, was  
1594 further enhanced to the subspot level using the BayesSpace algorithm. The enhanced signals at the subspot  
1595 level were then rescaled to a ratio of 1 across genes. To gain insights into cell-type distributions, the  
1596 averaged expression of gene sets enriched in specific cell types, acquired from single-nucleus RNA  
1597 sequencing (snRNA-seq) references, was calculated. Cell-type locations were inferred by assessing the  
1598 relative profile similarity score, allowing identification and mapping of different cell types within the spatial  
1599 transcriptome data. By employing these techniques, the spatial transcriptome analysis achieved higher  
1600 resolution, enabling a more detailed understanding of the cellular composition and gene expression  
1601 patterns within the tissue of interest.
- 1602



# Fig S5 - related to Fig2

## A Histology — Spatial transcriptome — Rim analysis

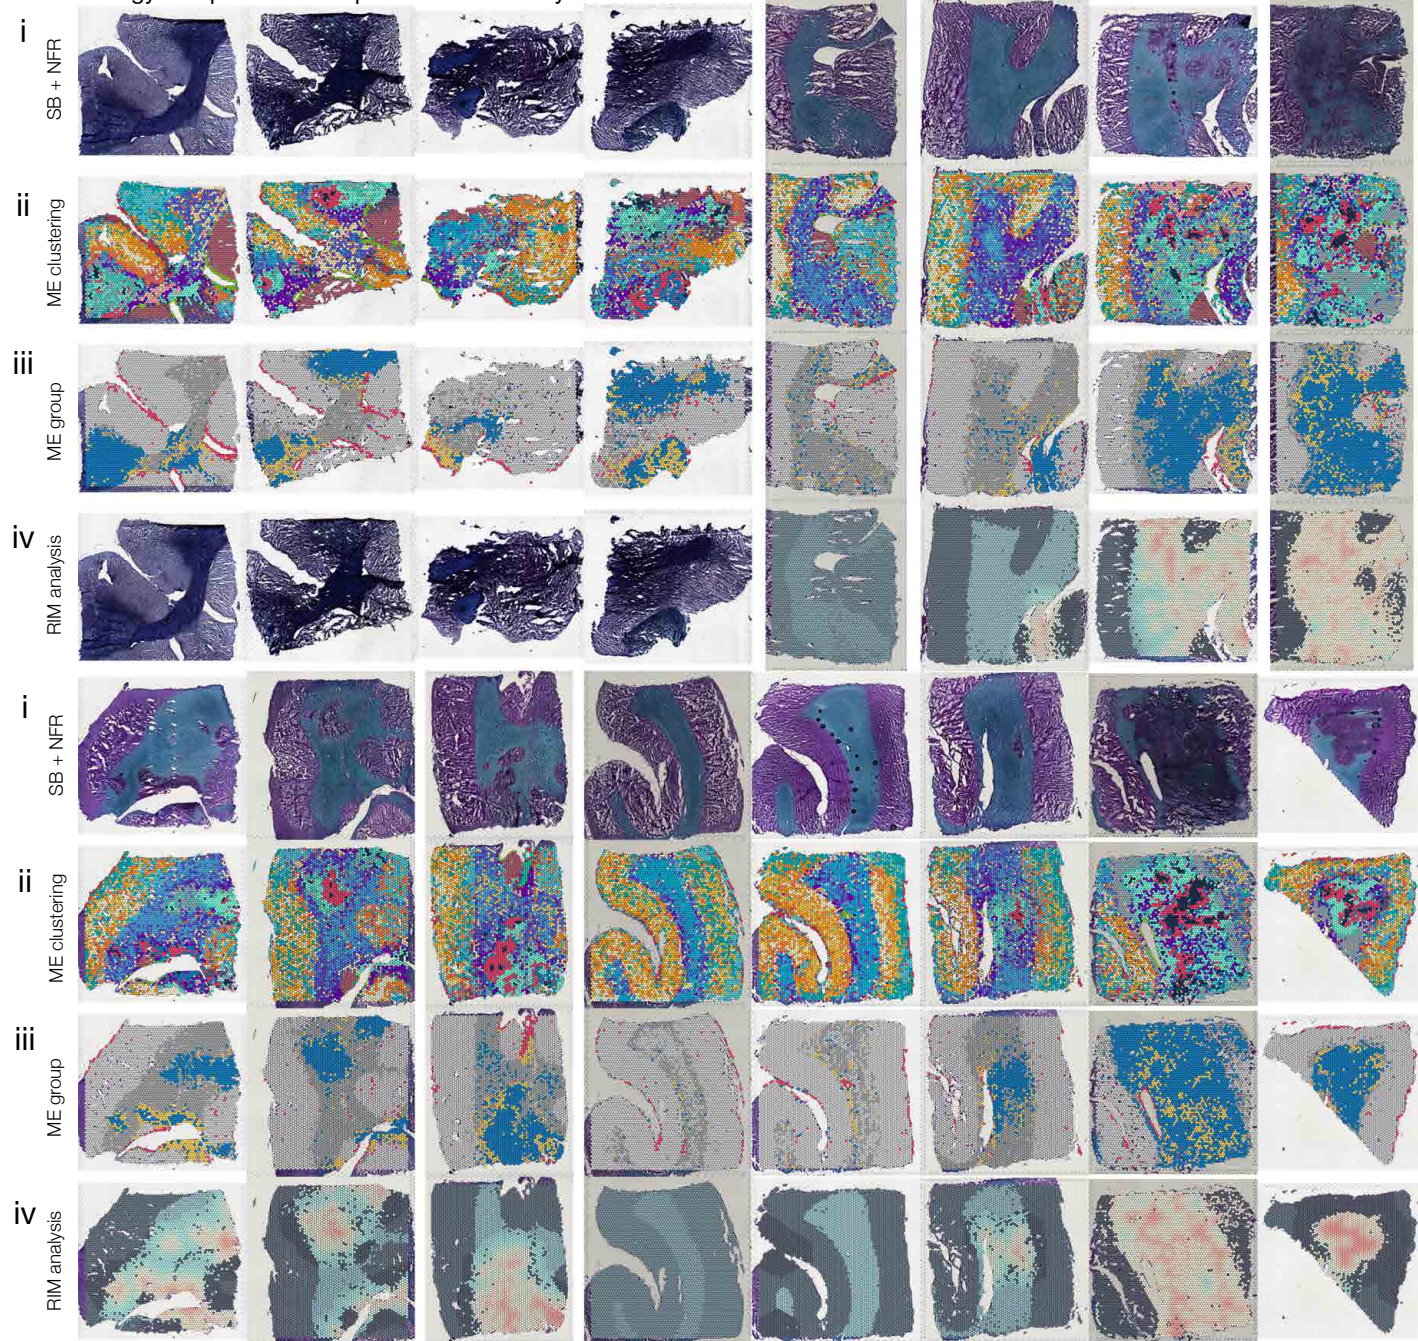

## B ME distribution across conditions

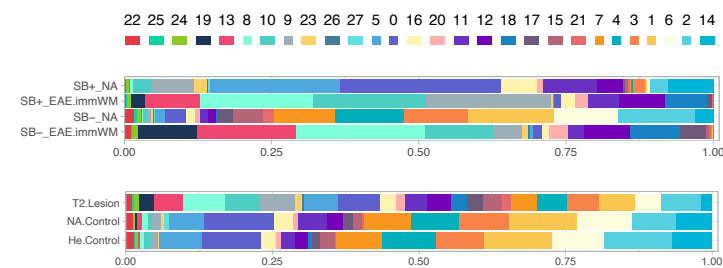

## C Enriched ME between subregions in relation to lesions

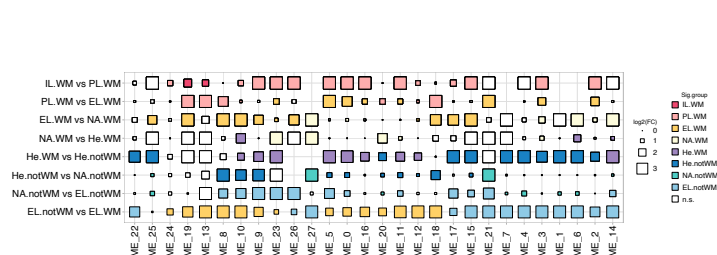

## D

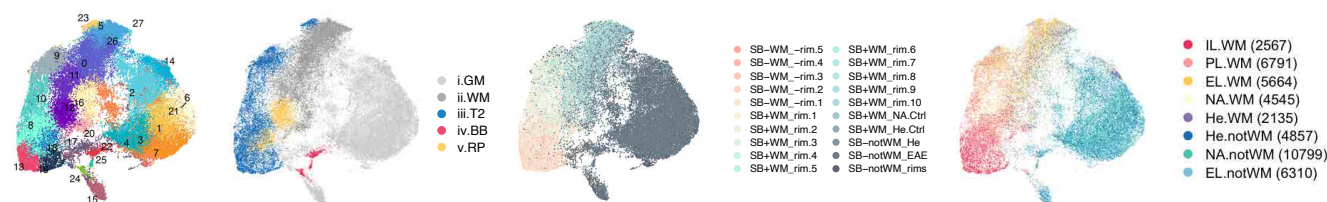



1603 FigS5. related to Fig2. Matched brain regions of interest across pathological states are color-coded based on  
1604 different microenvironment (ME) phenotypes.

1605

1606 (A) To demonstrate the phenotypic characterization of the ME within matched brain regions, contrasts  
1607 between: i) myelin content visualized through Sudan black (SB) and nuclear fast red (NFR) staining, ii)  
1608 unbiased ME clustering achieved through transcriptome similarity analysis, iii) 5 ME groups assigned by ME  
1609 profile similarity, and iv) lesion subregions assigned using rim analysis and overlaid onto SB/NFR stained  
1610 images, were indexed. The "Color Deconvolution" (**FigS4B**) for Samples 1–4 was unsuccessful due to  
1611 suboptimal contrast between SB and NFR staining, resulting in their exclusion from the lesion subregion  
1612 assignment in the rim analysis; however, they are included for ME clustering analysis.

1613 (B) Stacked bar plots show the relative proportions of transcriptomic ME at the spot resolution across different  
1614 pathological states (top), as well as the levels of myelin and inflammation (bottom).

1615 (C) Dot plots depict the change in spot proportion across subregional white matter (WM) of Samples 5–16.  
1616 Significantly ( $FDR < 0.05$  &  $abs(\text{Log}_2\text{FC}) > 0.5$ ) enriched ME between pairs of subregional WM area are  
1617 colored accordingly. "IL.WM" contains SB-WM\_-rim5 to SB-WM\_-rim2, "PL.WM" contains SB-WM\_-rim1  
1618 to SB+WM\_rim1, "EL.WM" contains SB+WM\_rim2 to SB+WM\_rim10), "NA.WM" contains SB+WM\_NA.Ctrl,  
1619 "He.WM" contains SB+WM\_He.Ctrl, "He.notWM" contains SB-notWM\_He, "NA.notWM" contains SB-  
1620 notWM\_EAE, and "EL.noWM" contains SB-notWM\_rims.

1621 (D) UMAP plots colored by ME cluster (**left**), subregions assigned by rim analysis (**middle**), and subregional WM  
1622 (**right**).

1623

# Fig S6 - related to Fig2

## A Spatial transcriptome ME clustering & subregional rim annotation

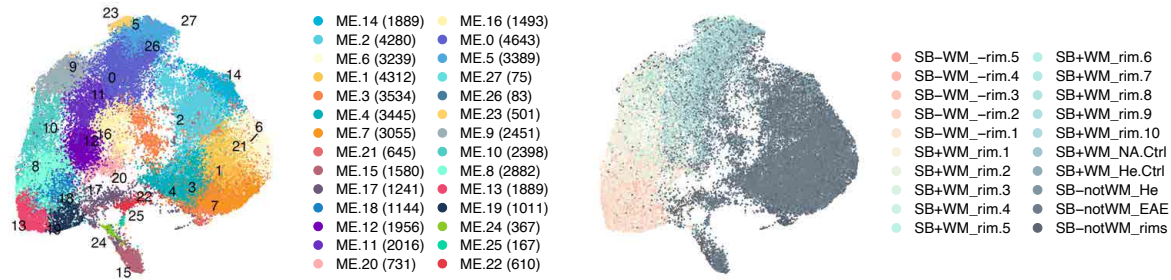

## B Gene module & gene ontology (GO) analysis

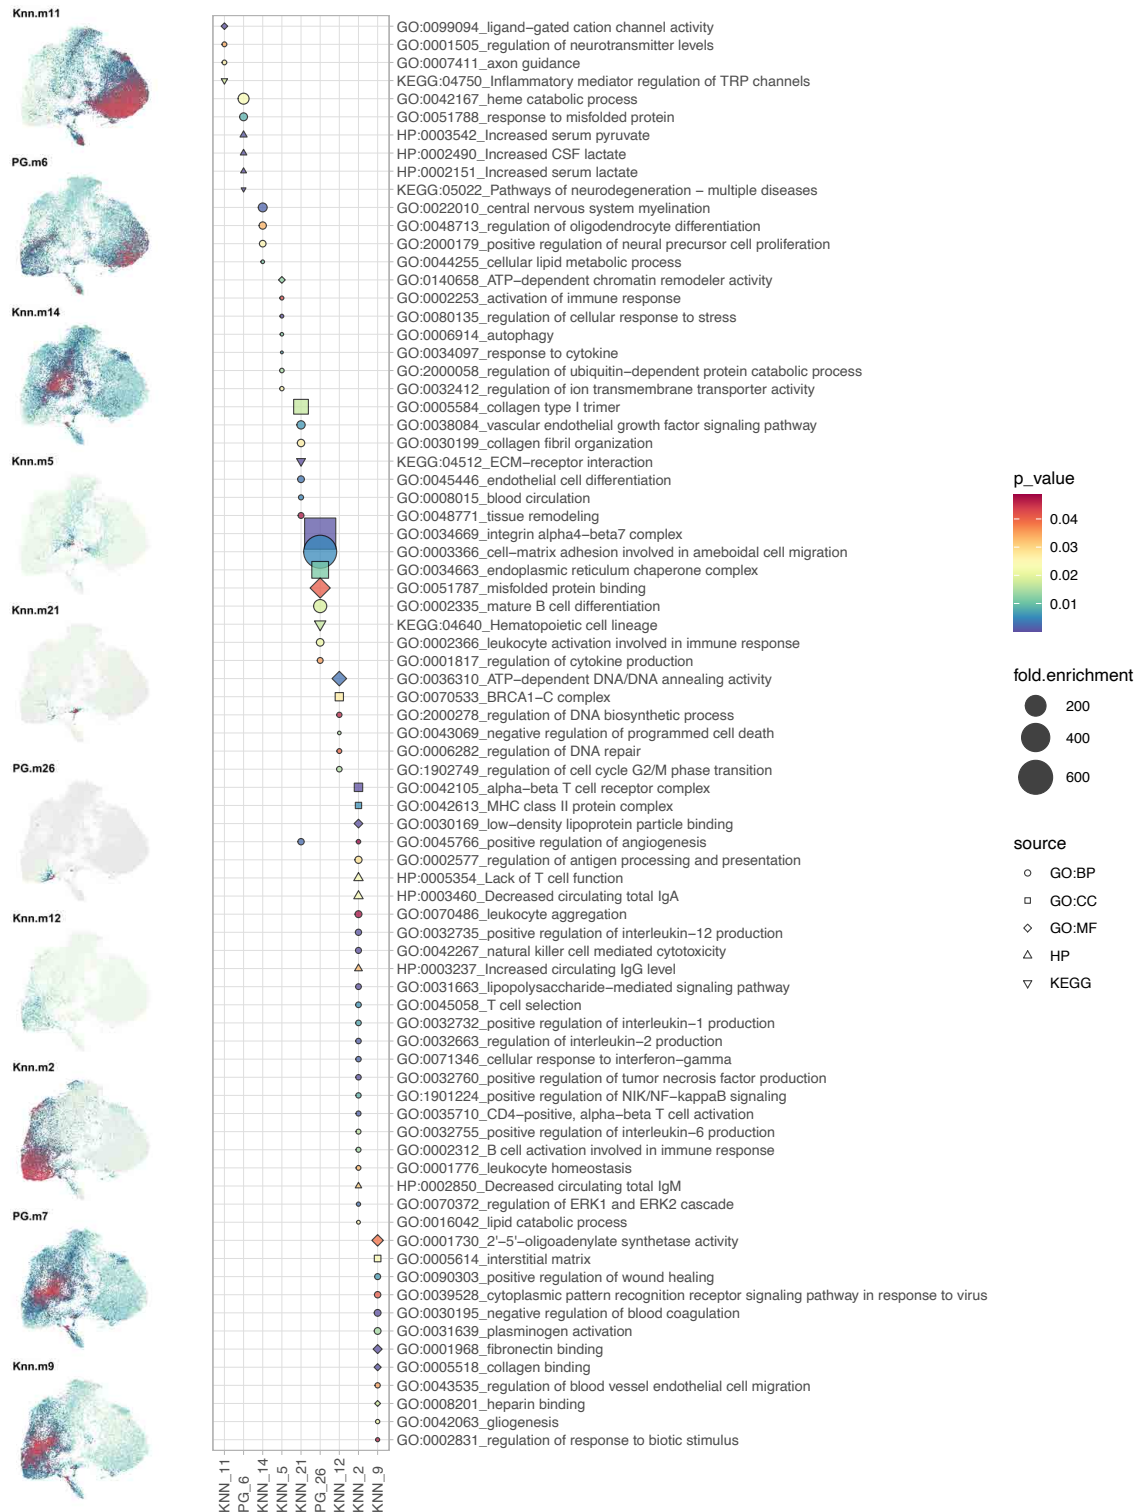



1624 **FigS6. related to Fig2. Spatial organization of transcriptomes within different microenvironments and**  
1625 **functional enrichment of gene modules within subregions.**

1626

1627 (A) UMAP scatter plots color-coded by microenvironment (ME) clustering and subregional labeling. The  
1628 number of spots per microenvironment is indicated in parentheses. Abbreviations: SB (Sudan black), WM  
1629 (white matter), NA (normal appearing), He (healthy), Ctrl (control).

1630 (B) UMAP scatter plots color-coded by gene expression. Gene modules are annotated with enriched Gene  
1631 Ontology (GO) terms, including three major subontologies: Molecular Functions (MF), Biological Process  
1632 (BP), and Cellular Component (CC). When available, additional annotations from the KEGG and HP  
1633 databases are included. Specifically, the Knn.m11 gene module is enriched in ME14, 2, 6, 1, 3, 4, 7, 21, 15,  
1634 17, which dominate the SB-notWM (gray matter) area and are involved in the regulation of  
1635 neurotransmitter levels, as expected. Perilesional (SB+WM\_rims) and lesional (SB-WM\_rims) ME are  
1636 enriched with modules involved in various processes, including myelination and lipid metabolism (Knn.m14),  
1637 glycometabolism and neurodegeneration (PG.m6), immune and stress response (Knn.m5 and Knn.m2),  
1638 extracellular matrix (ECM) and vascular function (Knn.m21 and Knn.m9), hematopoietic and leukocytic cell  
1639 development (PG.m26 and Ken.m2), and programmed cell death and cell cycle (Knn.m12).

1640



# Fig S7.continued - related to Fig2

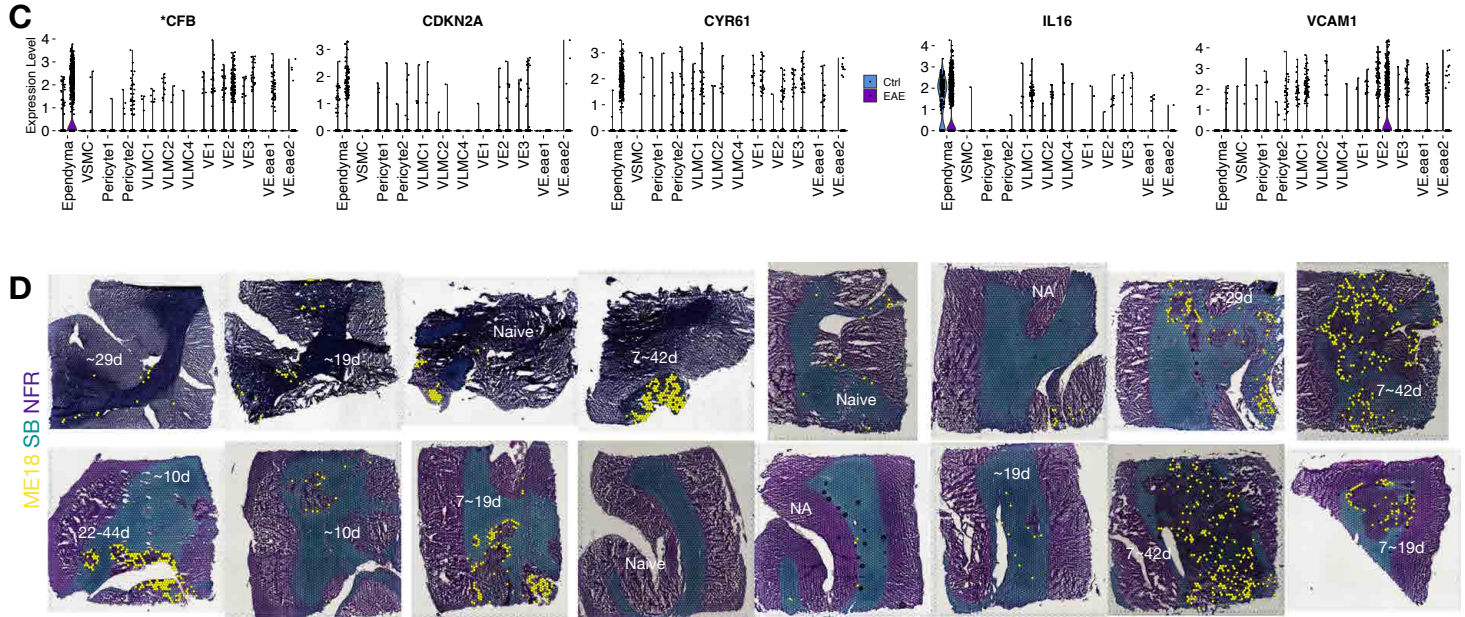



1641 **FigS7. related to Fig2. Complement factor B (CFB) expression is elevated in EAE ependyma compared to control,**  
1642 **and ME18 is enriched in older lesions.**

1643

1644 (A) Dot plot showing the averaged and scaled expression of selected genes across microenvironments (ME).  
1645 Gene names starting with "\*" indicate human (hs) or mouse (mm) orthologs of marmoset gene  
1646 identification numbers (See **Table S9** for the full list).

1647 (B) Dot plot showing the averaged and scaled expression of selected genes across L2 subclusters. Genes are  
1648 split into groups to aid label tracking. Abbreviations: ME marker (genes used to annotate ME groups in  
1649 **Fig2A**), ME DEG (differentially expressed genes across 28 ME), rDEG (regional differentially expressed  
1650 genes), ferro. (ferroptosis genes), compl. (complement genes), dOPC (differentiating OPC enriched genes).

1651 (C) Violin plot showing the expression of \**CFB* (human homolog of marmoset ENSCJAG00000048204), *CDKN2A*,  
1652 *CYR61*, *IL16*, and *VCAM1* across vascular cells in control and EAE.

1653 (D) SB/NFR-stained tissue across 16 ROI labeled by the distribution of ME18 (yellow dots) and annotated by  
1654 lesion age, dated by longitudinal MRI (**Methods**).

1655



1656 **FigS8. related to Fig2. Selected L1 and L2 genes for each cell class and subcluster.**

1657

1658 (A) Dot plot showing the averaged and scaled expression of selected genes used to infer cell types for  
1659 BayesSpace-enhanced subspots across L2 subclusters.

1660 (B) BayesSpace-enhanced subspots colored by inferred cell types across 16 ROI labeled by crude disease  
1661 category.

1662



# Fig S9 - related to Fig3

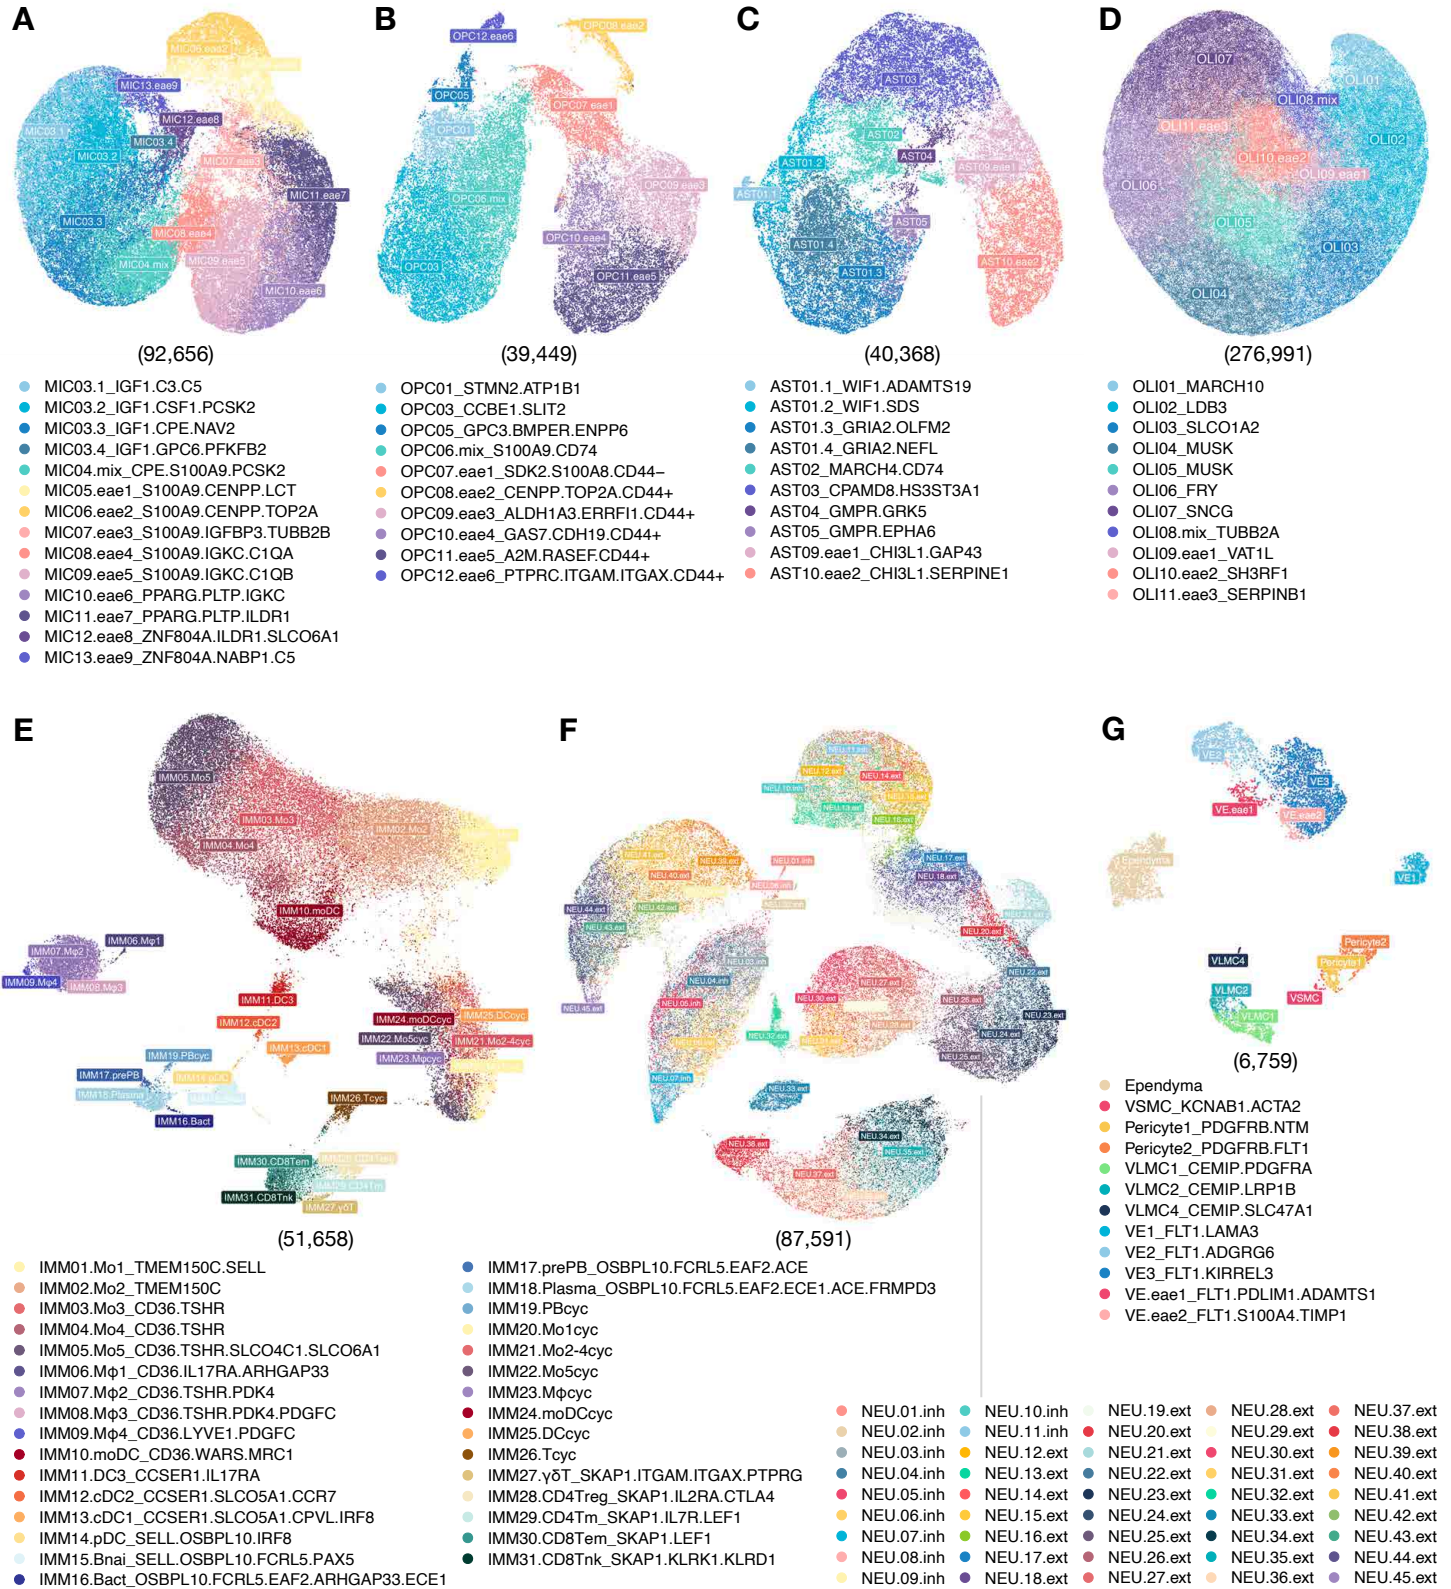



1663 **FigS9. related to Fig3. UMAP scatter plot of the level 2 analysis conducted on major cell classes.**

1664

1665 (A) – (G) The level 1 (L1) analysis identified 6 major cell classes, which were further divided into 7 partitions in  
1666 the level 2 (L2) analysis. UMAP scatter plots show subclustering of the following cell classes: microglia (MIC),  
1667 oligodendrocyte progenitor cells (OPC), astrocytes (AST), oligodendrocytes (OLI), peripherally derived  
1668 immune cells (P.IMM), neurons (NEU), and vascular/meningeal/ventricular cells (VAS). The number of  
1669 nuclei analyzed in each L2 UMAP plot is listed in parentheses.

1670

# Fig S10 - related to Fig3

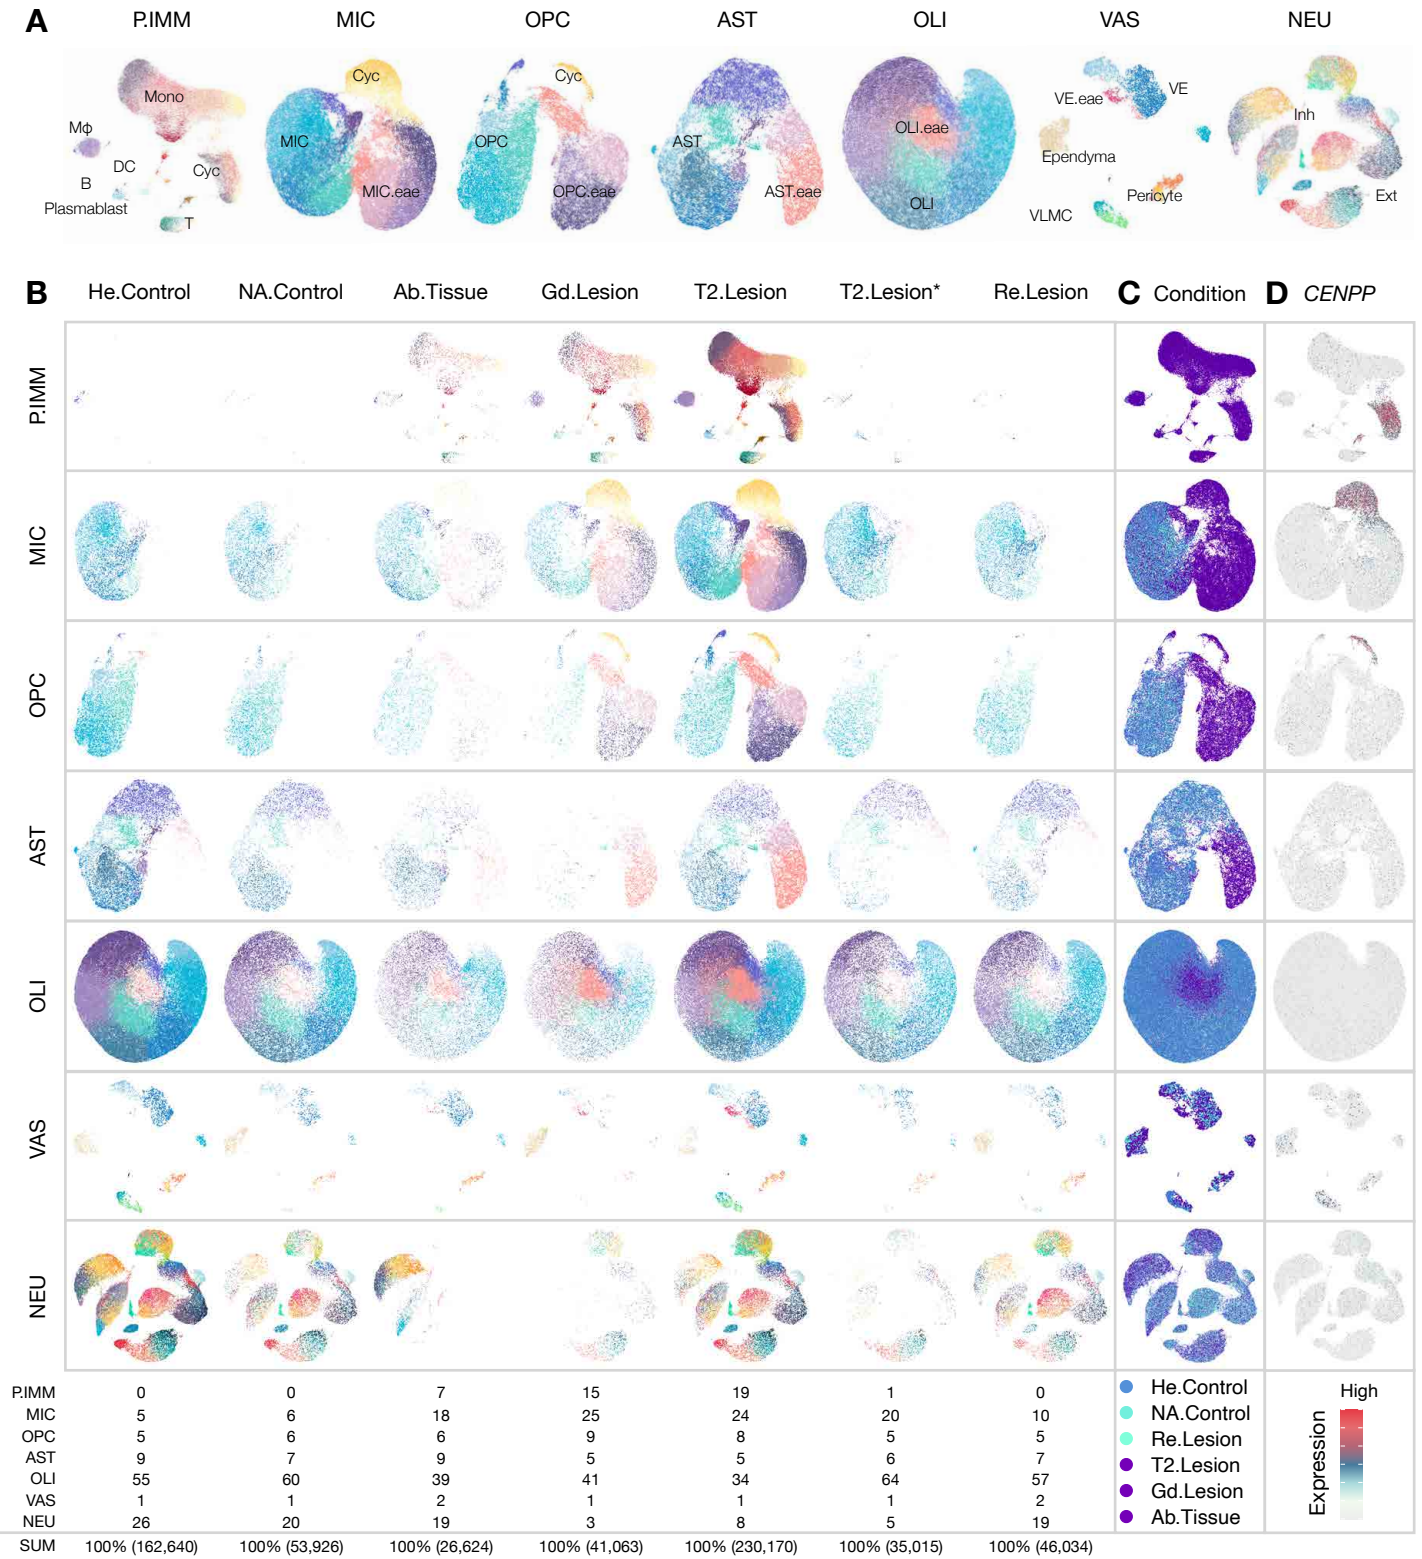

1671 **FigS10. related to Fig3. Glial and immune cells diversity across pathological states.**

1672

1673 (A) UMAP plots of the level 2 (L2) partitions labeled with major subtypes enriched in animals with experimental  
1674 autoimmune encephalomyelitis (EAE). The abbreviations: mono (monocytes), M $\phi$  (macrophages), DC  
1675 (dendritic cells), B (B cells), T (T cells), Cyc (cycling cells), VE (vascular endothelial cells), VLMC (vascular  
1676 leptomeningeal cells), Inh (inhibitory neurons), and Ext (excitatory neurons).

1677 (B) UMAP plots split by disease conditions and colored by level 2 subclusters. This visual representation allows  
1678 for the comparison and observation of cell distribution patterns specific to each disease condition. The  
1679 abbreviations: He (healthy), NA (normal-appearing), Re (resolved), T2 (transverse relaxation time), Gd  
1680 (gadolinium), and Ab (abnormal).

1681 (C) UMAP plots across the L2 cell classes, colored by disease conditions. This representation helps in visualizing  
1682 the dominant subclusters across different disease conditions.

1683 (D) UMAP plots across the L2 cell classes, colored by the expression level of the CENPP (Centromere Protein P)  
1684 gene. This annotation allows for the identification of cycling cells within the cell classes.

1685

# Fig S11 - related to Fig3

## A Relative proportion of cell classes and subclusters across tissue type and condition

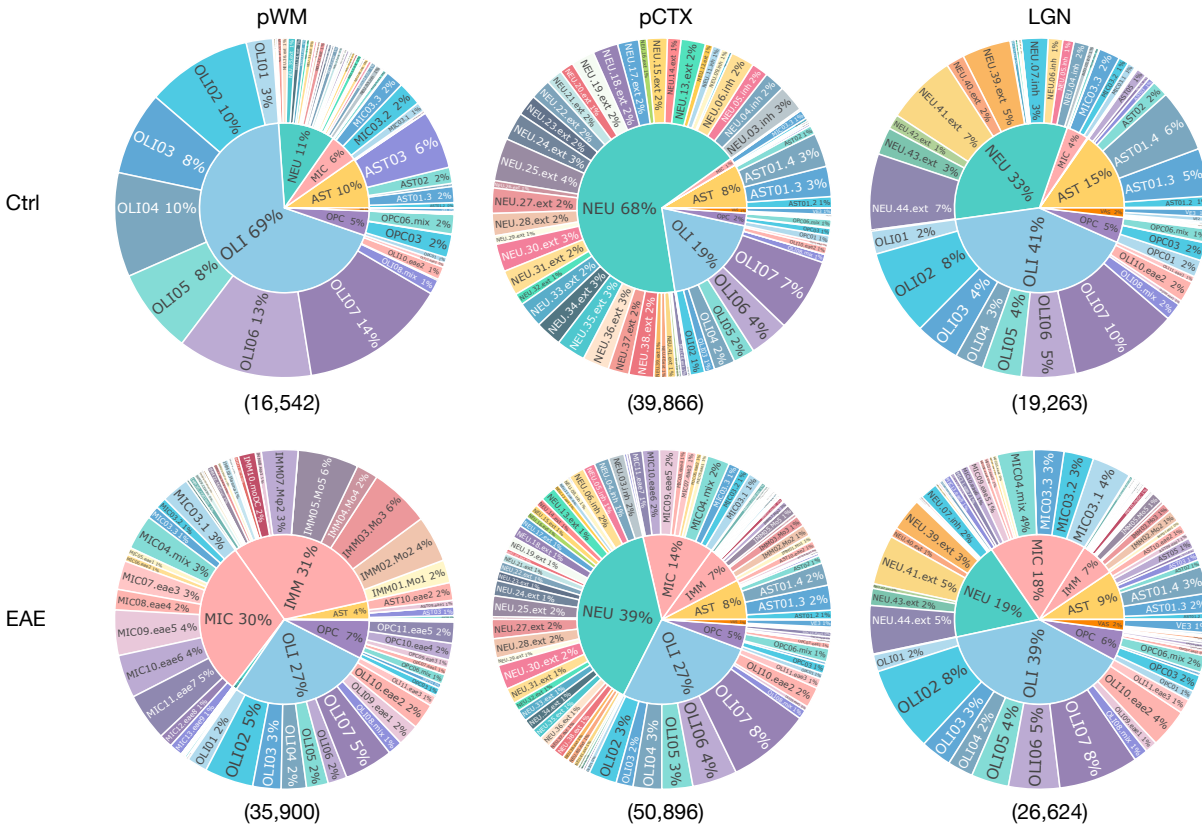

## B Relative proportion of subclusters across tissue type in EAE

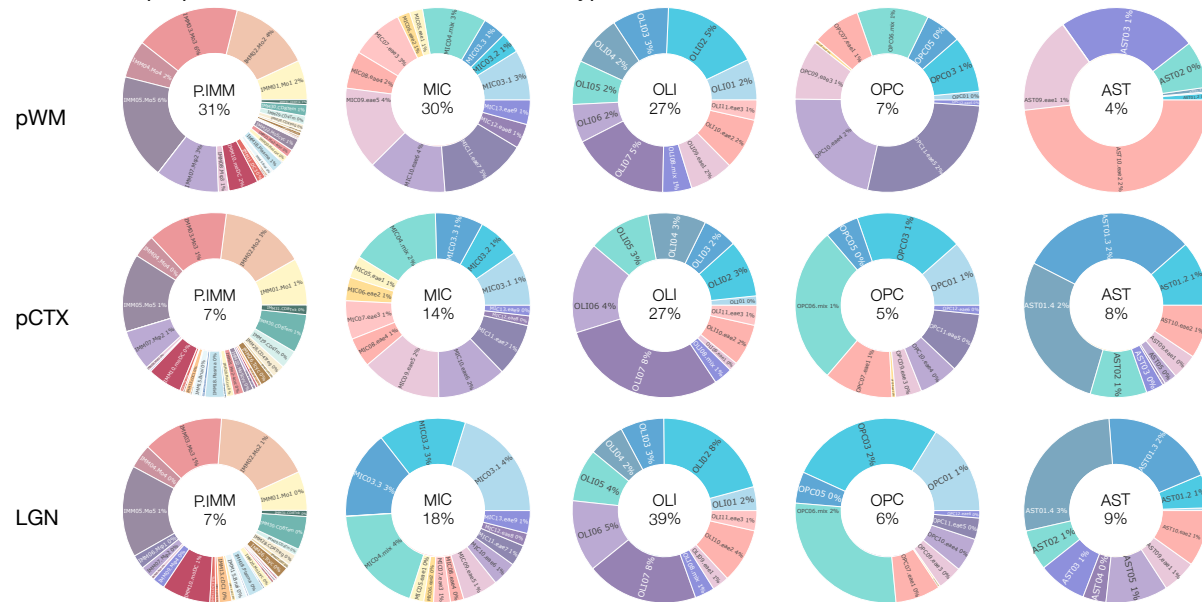

## C Profile of transcription factors enriched in EAE

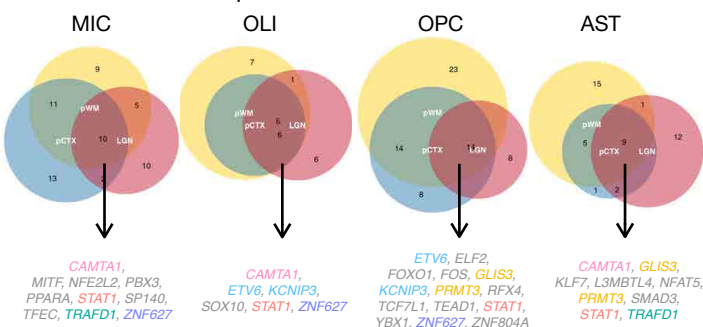

## D GO analysis of shared transcription factors

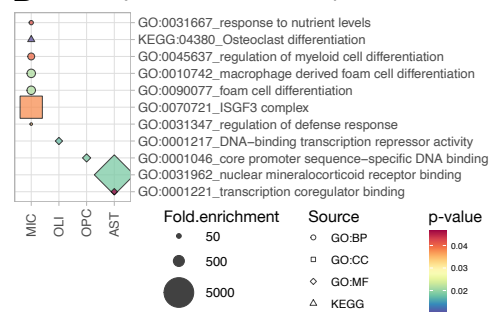

1686 **FigS11. related to Fig3. Comparative analysis of cell types and changes in transcription factors across different**  
1687 **tissue types in response to EAE.**

1688

1689 (A) The inner pie charts show the relative nuclei proportion of L1 cell classes, and the outer donut charts display  
1690 L2 sub-clusters. Both control and EAE samples for each tissue type are included, with the total number of  
1691 nuclei listed in parentheses. In control animals, the composition of L1 cell classes varied across tissue types,  
1692 as expected. Specifically, a higher number of glial cells were found in parietal white matter (pWM), while  
1693 neurons were predominant in parietal cortex (pCTX) and lateral geniculate nucleus (LGN) region. In EAE  
1694 animals, there was a significant expansion of microglia (MIC) and peripheral immune cells (P.IMM)  
1695 partitions in all tissue types.

1696 (B) Donut charts show the relative nuclei proportion of glial and immune clusters in EAE animals across  
1697 different tissue types. The compositions of the P.IMM and oligodendrocytes (OLI) partitions were largely  
1698 similar across tissue types. However, the compositions of MIC, oligodendrocyte precursor cell (OPC), and  
1699 astrocyte (AST) partitions were unique to certain tissue types. Specifically, the OPC and AST compositions  
1700 were more similar in pCTX and LGN compared to pWM. On the other hand, the MIC composition was more  
1701 similar in pWM and pCTX compared to LGN.

1702 (C) Venn diagrams illustrate the similarity and diversity of transcription factors that are significantly enriched  
1703 in EAE compared to control animals across different tissue types for each glial cell class. The elevated  
1704 transcription factors shared by all tissue types in EAE animals are listed for each cell class, and the shared  
1705 transcription factors across different cell classes are color-coded accordingly.

1706 (D) Dot plot shows selective GO terms enriched for each list of shared transcription factors per glial cell class  
1707 listed in (C).

1708



# Fig S12 - related to Fig3

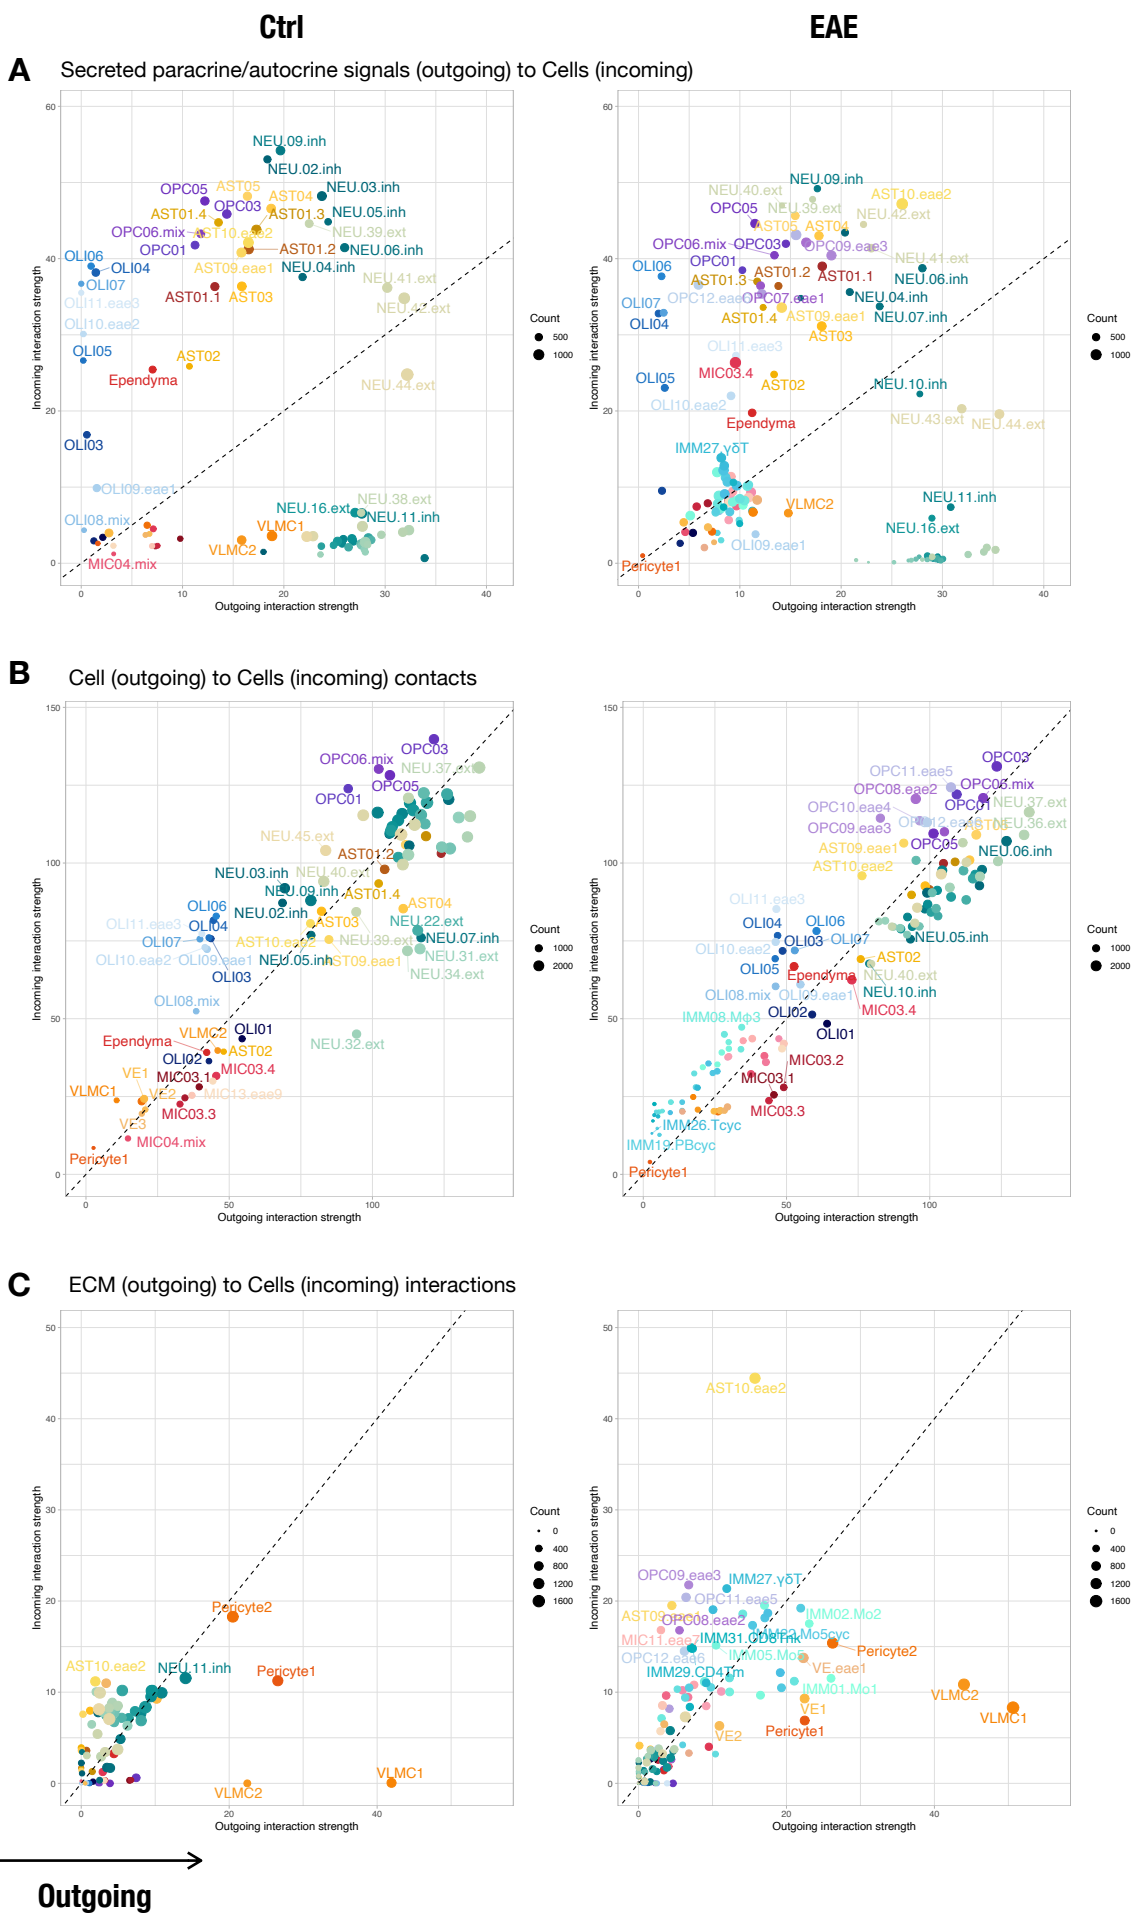

1709 **FigS12. related to Fig3. Communication preferences of cells within the white matter (WM) inferred by CellChat.**

1710

1711 (A) Incoming and outgoing secreted signal-to-cell strength across different conditions.

1712 (B) Incoming and outgoing cell-to-cell signaling strength across different conditions.

1713 (C) Incoming and outgoing extracellular matrix (ECM) signal-to-cell strength across different conditions.

1714



# Fig S13 - related to Fig 4

**A** MHC-I

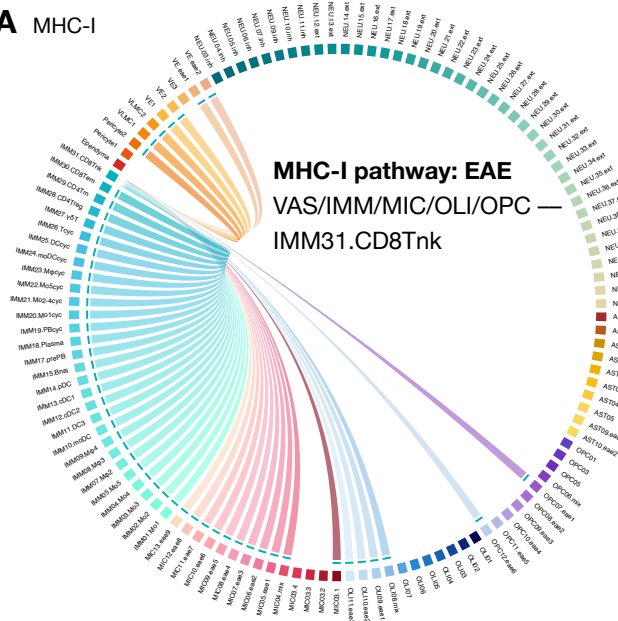

**B** MHC-II

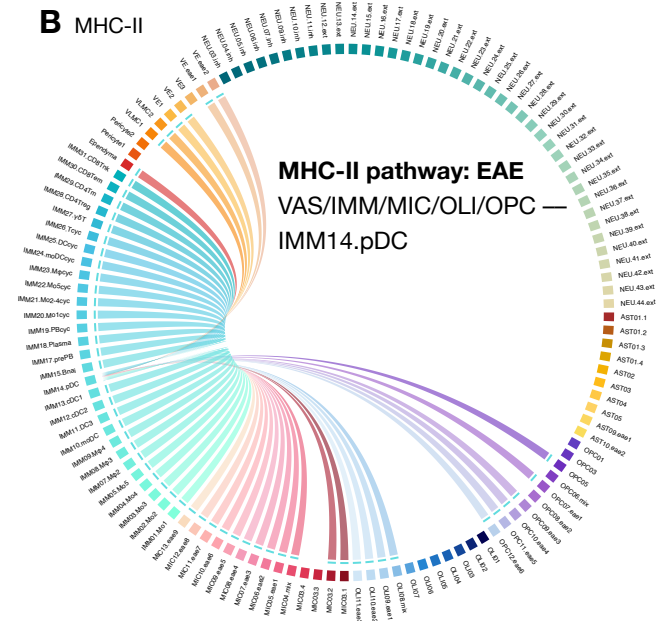

**C** CD45

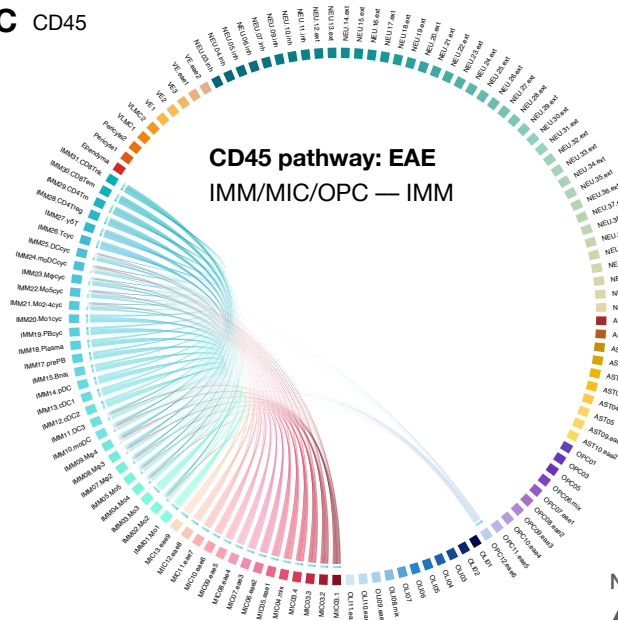

**D** CD86

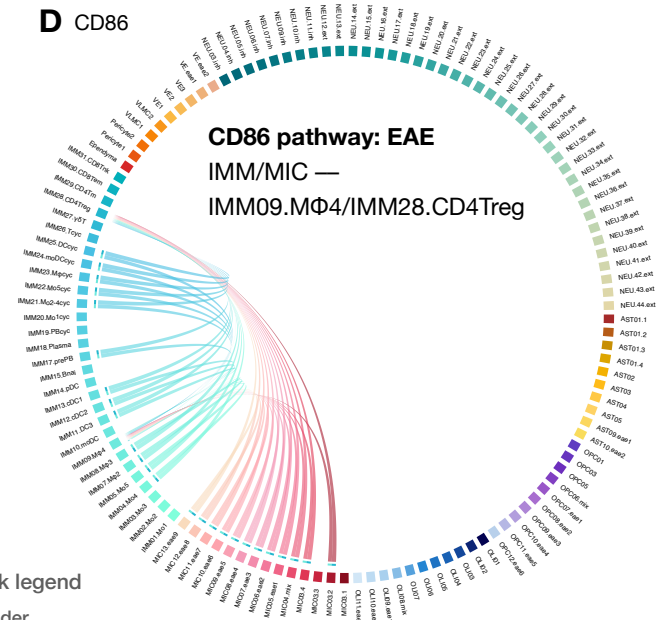

**Network legend**

- ▲ Sender
- ★ Sender & Receiver
- Receiver
- From L to R
- ➡ Higher probability score
- ★ Higher mediator score
- ☆ Higher influencer score

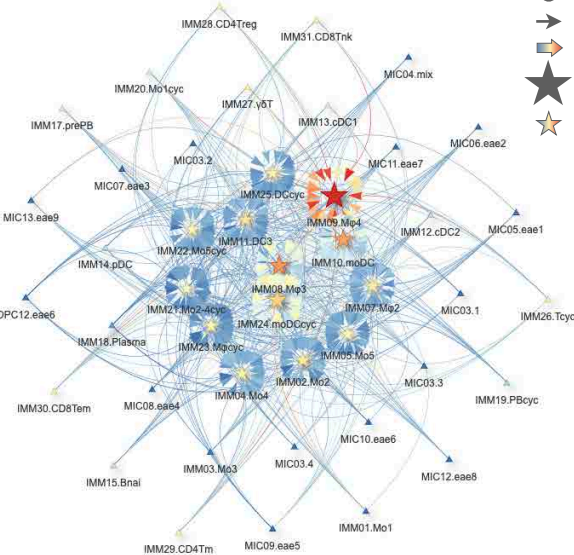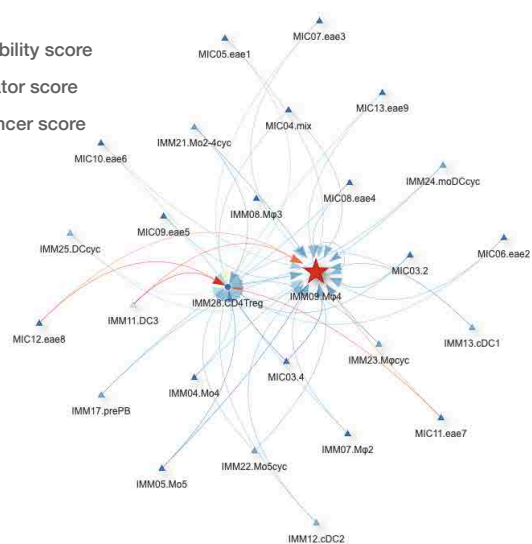

# Fig S13.continued - related to Fig4

**E** VCAM

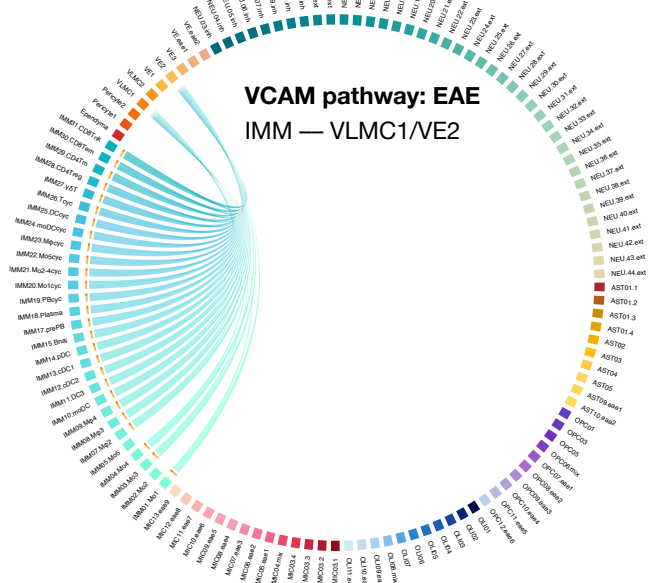

**F** APP

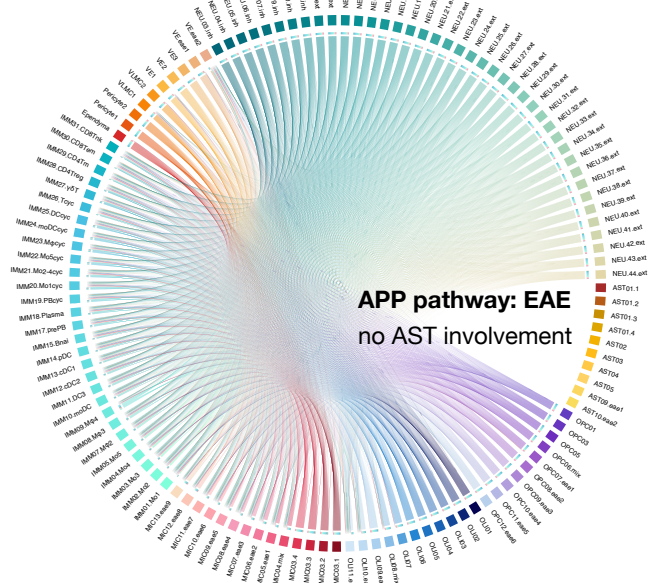

**G** SPP1

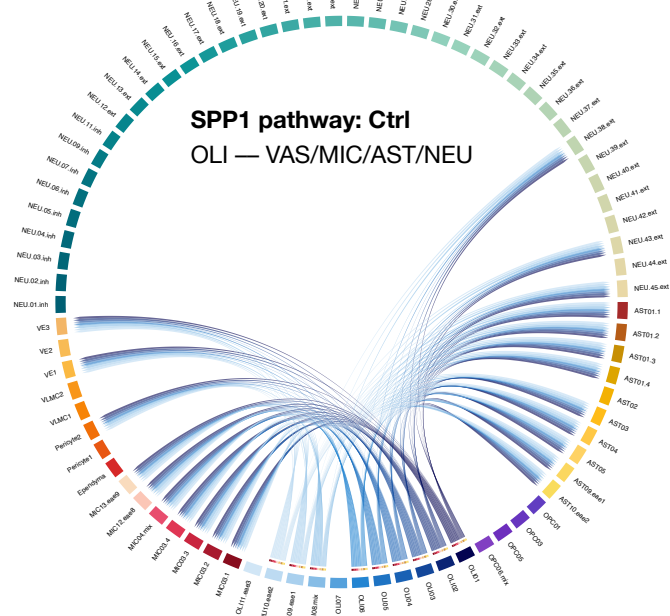

**H** SEMA7

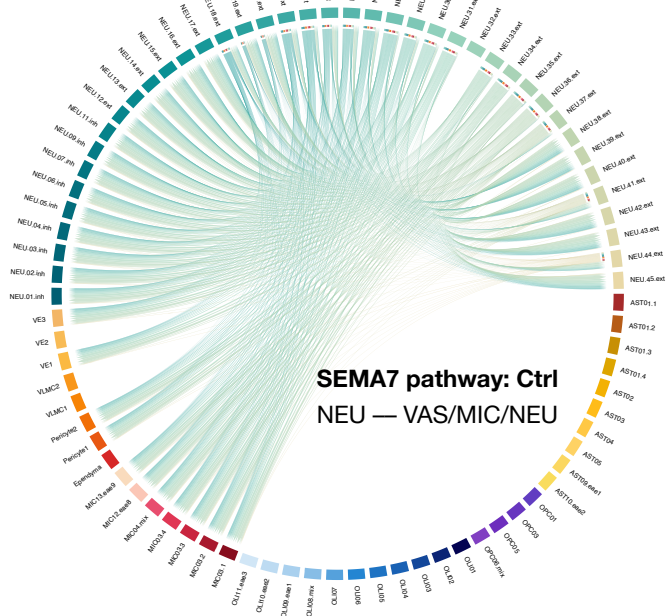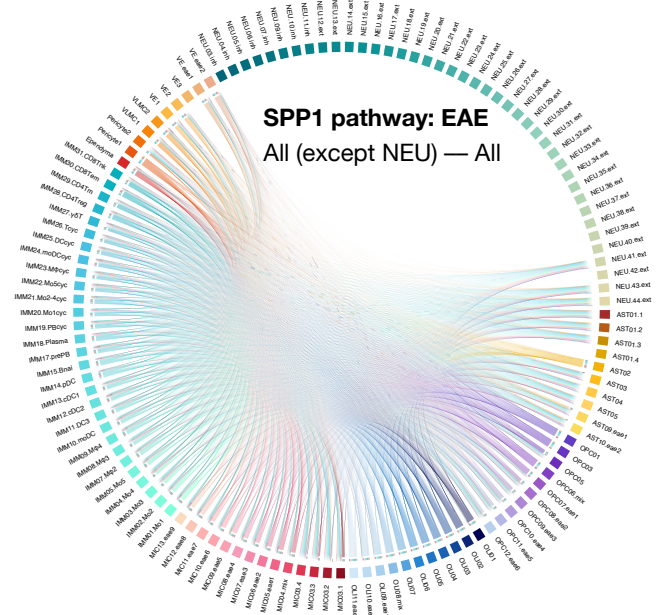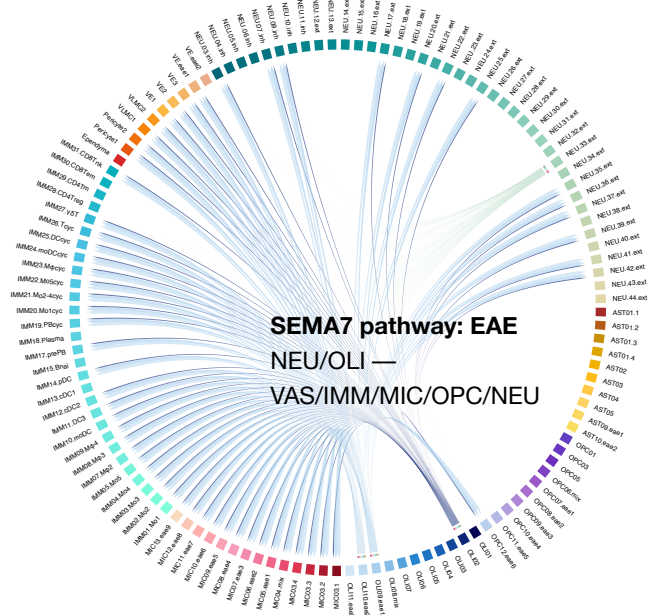



# Fig S13.continued - related to Fig4

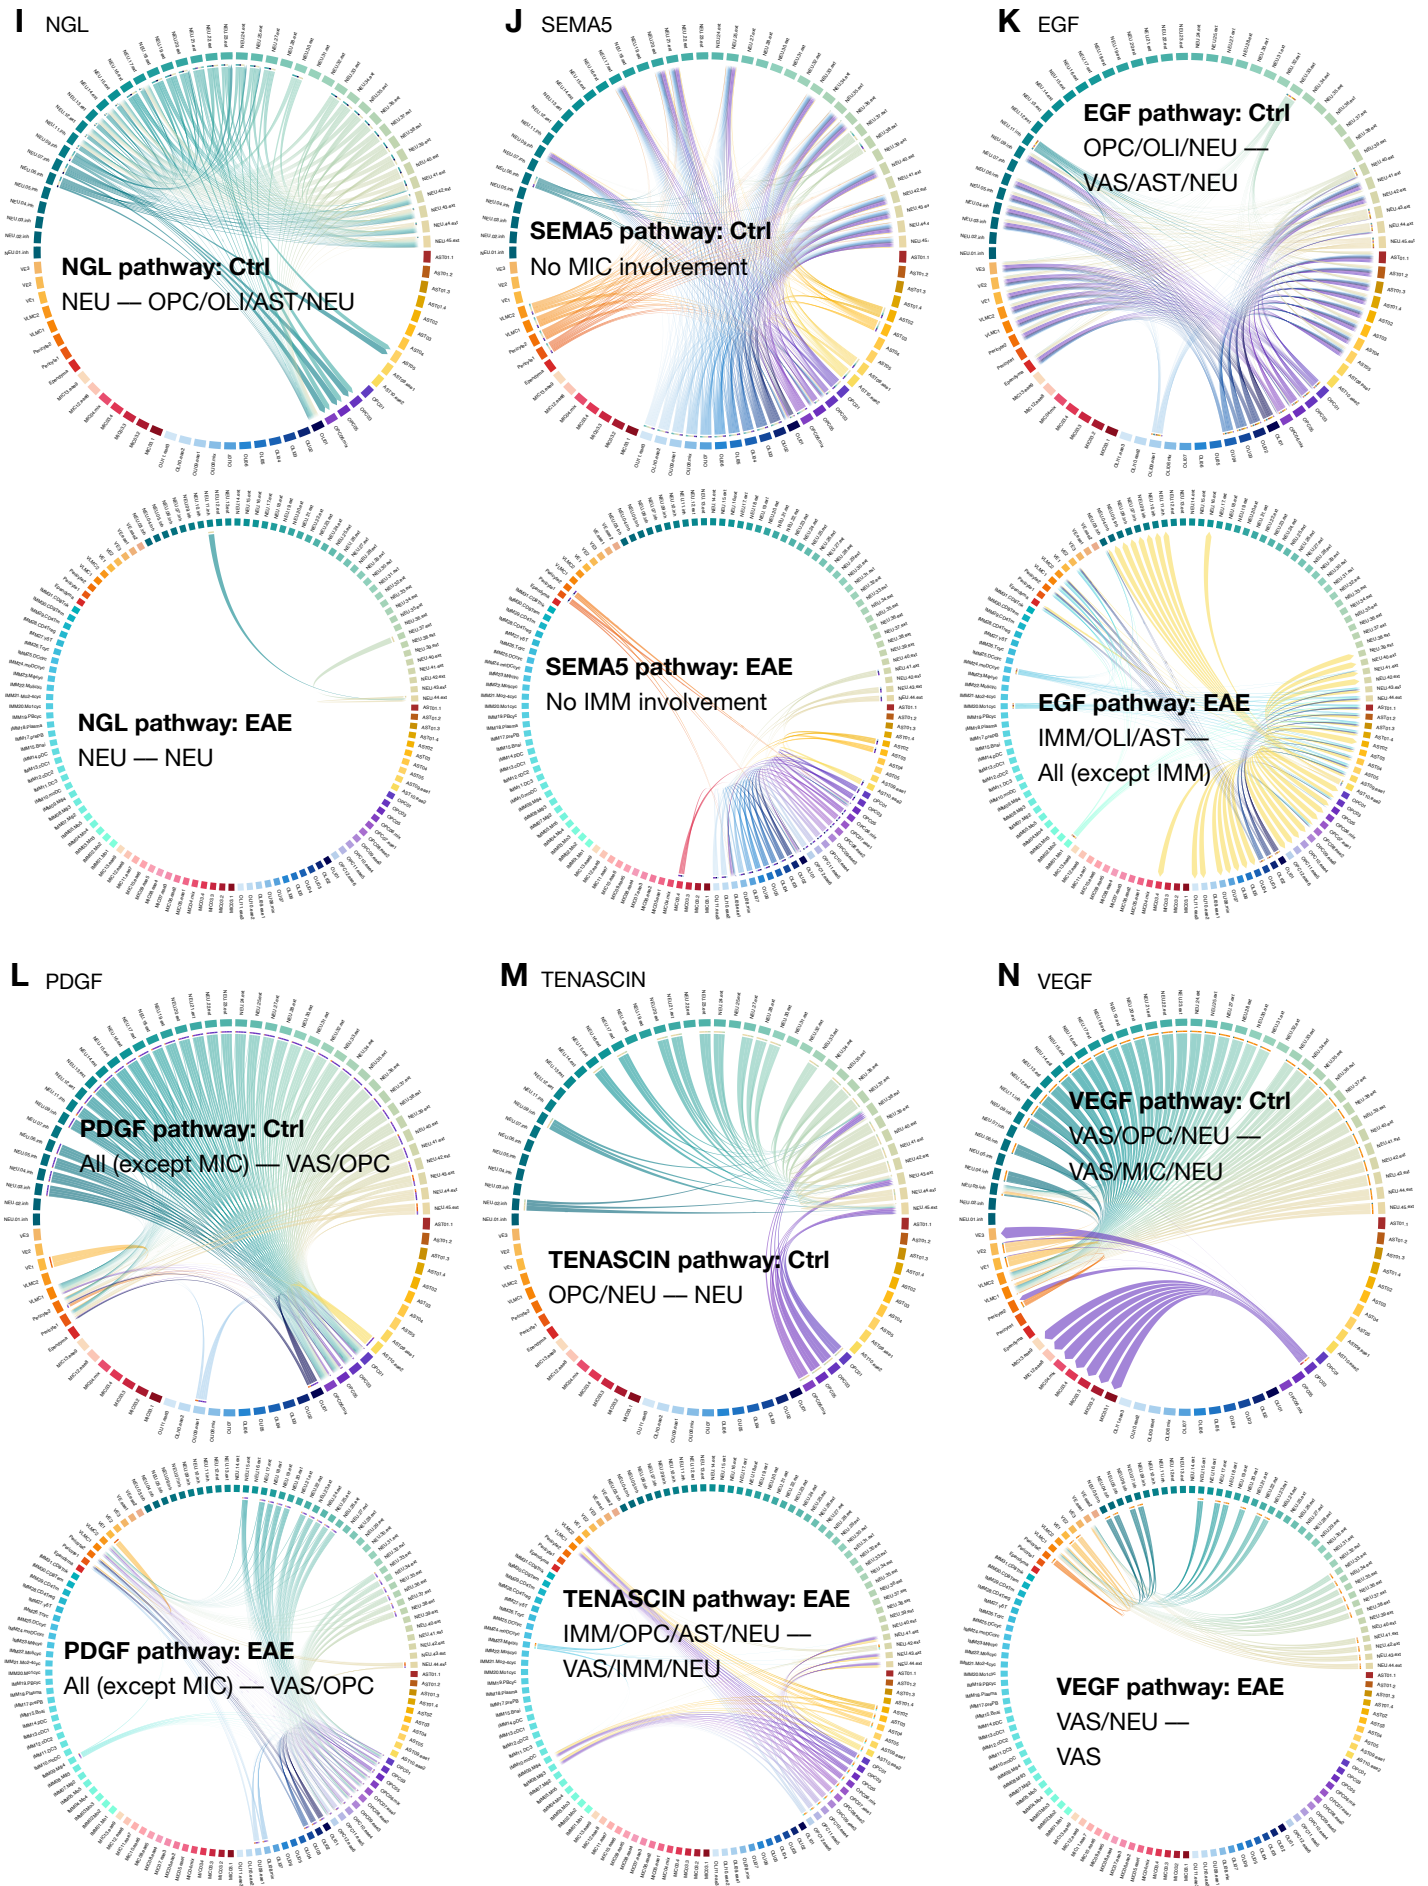

1715 **FigS13. related to Fig4. Chord diagrams and network plots summarize the intercellular communication profile**  
1716 **of selected pathways.**

1717

1718 (A) Inferred sender (ligand) and receiver (receptor) pairs of the MHC-I pathway between L2 subclusters of  
1719 white matter (WM) in EAE animals.

1720 (B) Same as (A) for MHC-II pathway in EAE animals.

1721 (C) Same as (A) for CD45 pathway in EAE animals.

1722 (D) Same as (A) for CD86 pathway in EAE animals.

1723 (E) Same as (A) for VCAM pathway in EAE animals.

1724 (F) Same as (A) for APP pathway in EAE animals.

1725 (G) Same as (A) for SPP1 pathway in control and EAE animals.

1726 (H) Same as (A) for SEMA7 pathway in control and EAE animals.

1727 (I) Same as (A) for NGL pathway in control and EAE animals.

1728 (J) Same as (A) for SEMA5 pathway in control and EAE animals.

1729 (K) Same as (A) for EGF pathway in control and EAE animals.

1730 (L) Same as (A) for PDGF pathway in control and EAE animals.

1731 (M) Same as (A) for TENASCIN pathway in control and EAE animals.

1732 (N) Same as (A) for VEGF pathway in control and EAE animals.

1733

# Fig S 4 - related to Fig 4

## A Significant LR pairs

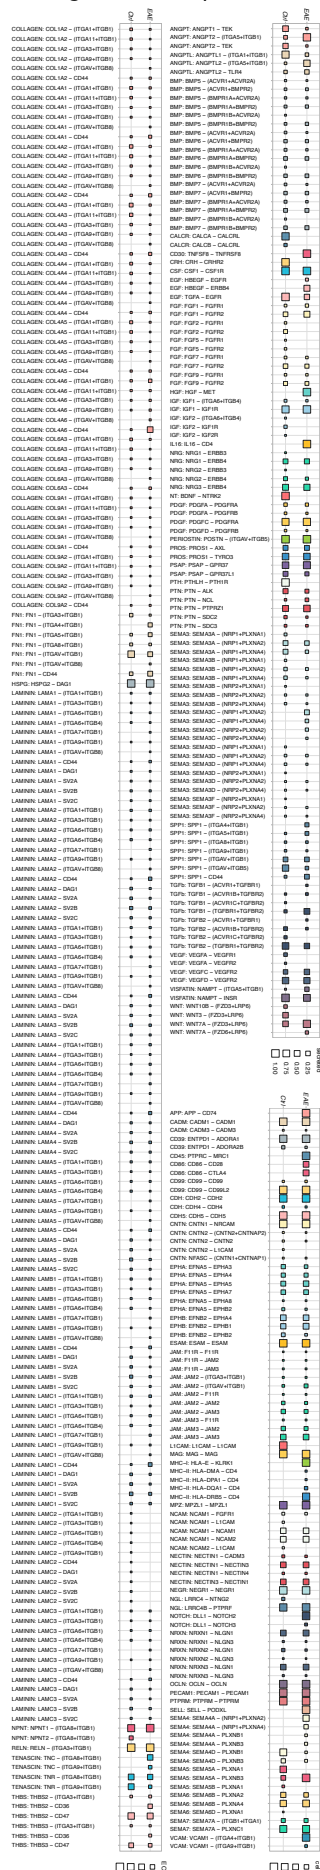

## B AST10.eae2 involved intercellular interactions

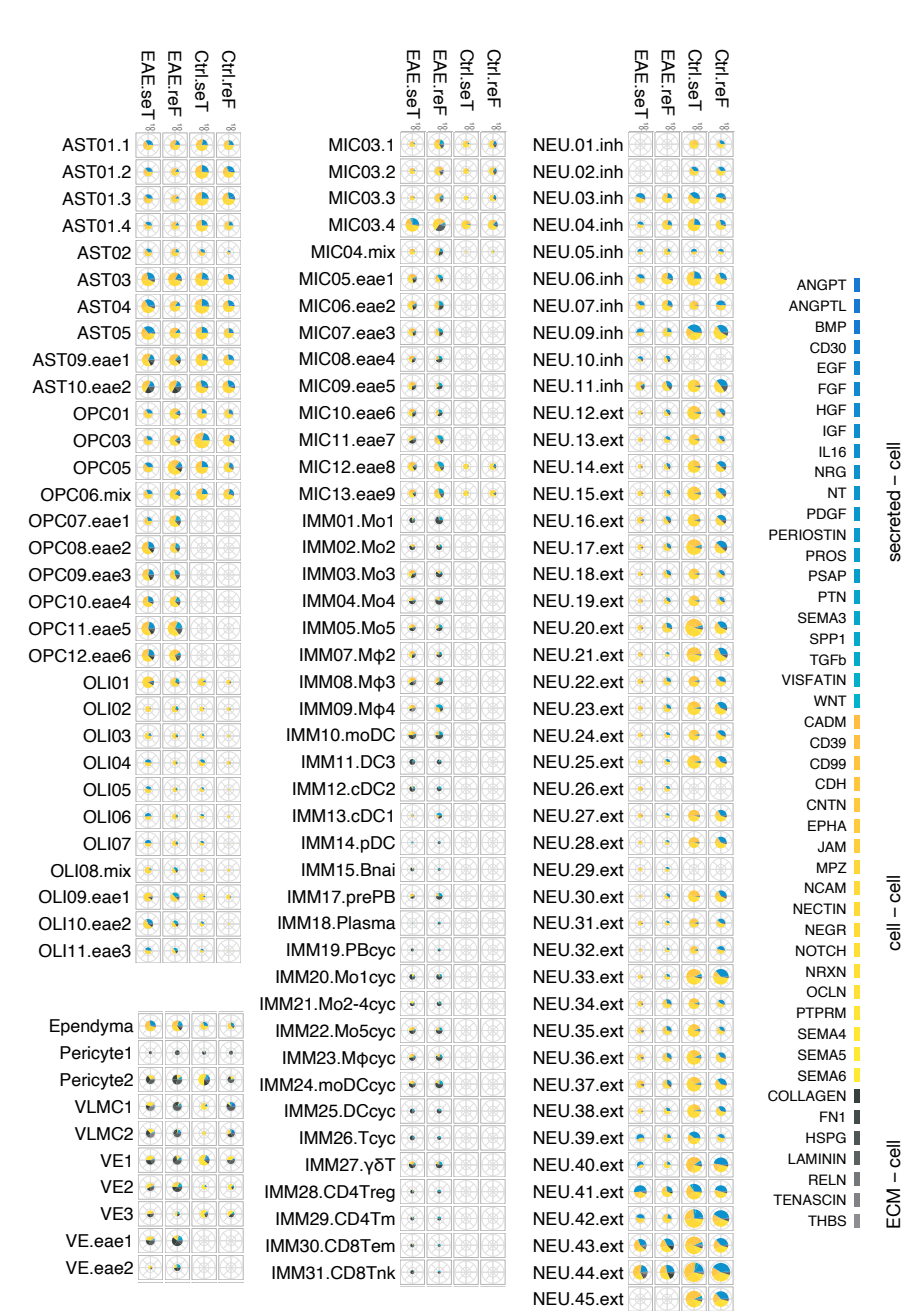

## C Inferred LR signaling between AST10.eae2 & OPC09.eae3

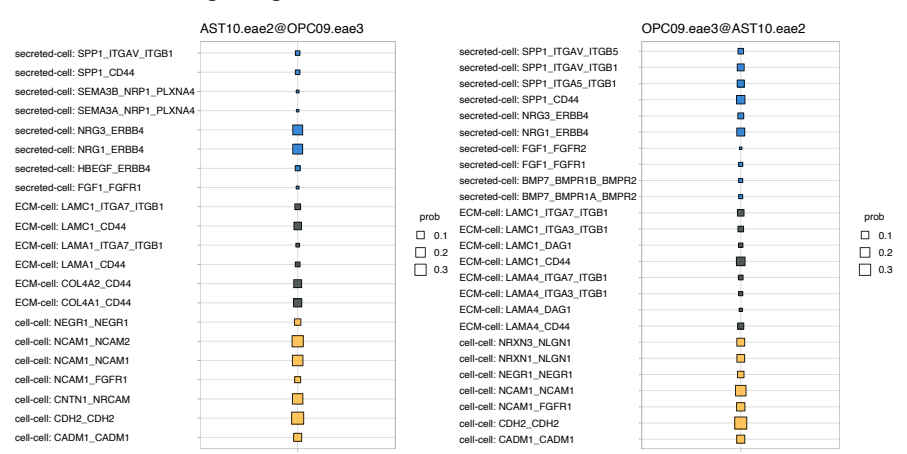

1734 **FigS14. related to Fig4. Significant ligand-receptor pairs inferred by CellChat across different pathological**  
1735 **states.**

1736

1737 (A) Dot plots showcase the relative contribution of each ligand-receptor (LR) pair to each signaling pathway;  
1738 signaling strength is indicated by dot color. Interactions are categorized into 3 types: secreted  
1739 autocrine/paracrine signaling interactions (secreted-cell), cell-cell contact interactions (cell-cell), and  
1740 extracellular matrix (ECM)-receptor interactions (ECM-cell). Each label follows the format of "pathway  
1741 name: ligand name – receptor name."

1742 (B) Pie charts depict the relative contribution of each pathway to overall interactions involving the AST10.eae2  
1743 subcluster per pathological state.

1744 (C) Dot plots show the relative contribution of each LR pair to each signaling category between the AST10.eae2  
1745 and OPC09.eae3 subclusters. Each label follows the format of "pathway category: ligand name\_receptor  
1746 name."
